# Supplementary material for: Selective binding and extraction of aqueous dihydrogen phosphate solutions via three-armed thiourea receptors
Source: Royal Society of Chemistry journal article supplement (doi:10.1039/c5ob01450f), 2015-01-01
Supplement: c5ob01450f1.pdf [file c5ob01450f1.pdf]

## Supporting Material

### Selective Binding and Extraction of Aqueous Dihydrogen Phosphate Solutions via Three-armed Thiourea Receptors

Evgeny V. Beletskiy<sup>1,2</sup> and Steven R. Kass<sup>2\*</sup>

<sup>1</sup>Current address: Department of Chemical and Biological Engineering, Northwestern University,  
2145 Sheridan Rd., Evanston, IL 60208 USA

<sup>2</sup>Department of Chemistry, University of Minnesota, 207 Pleasant St. S.E., Minneapolis, MN  
55455 USA.

\*To whom correspondence should be addressed. E-mail: [kass@umn.edu](mailto:kass@umn.edu)

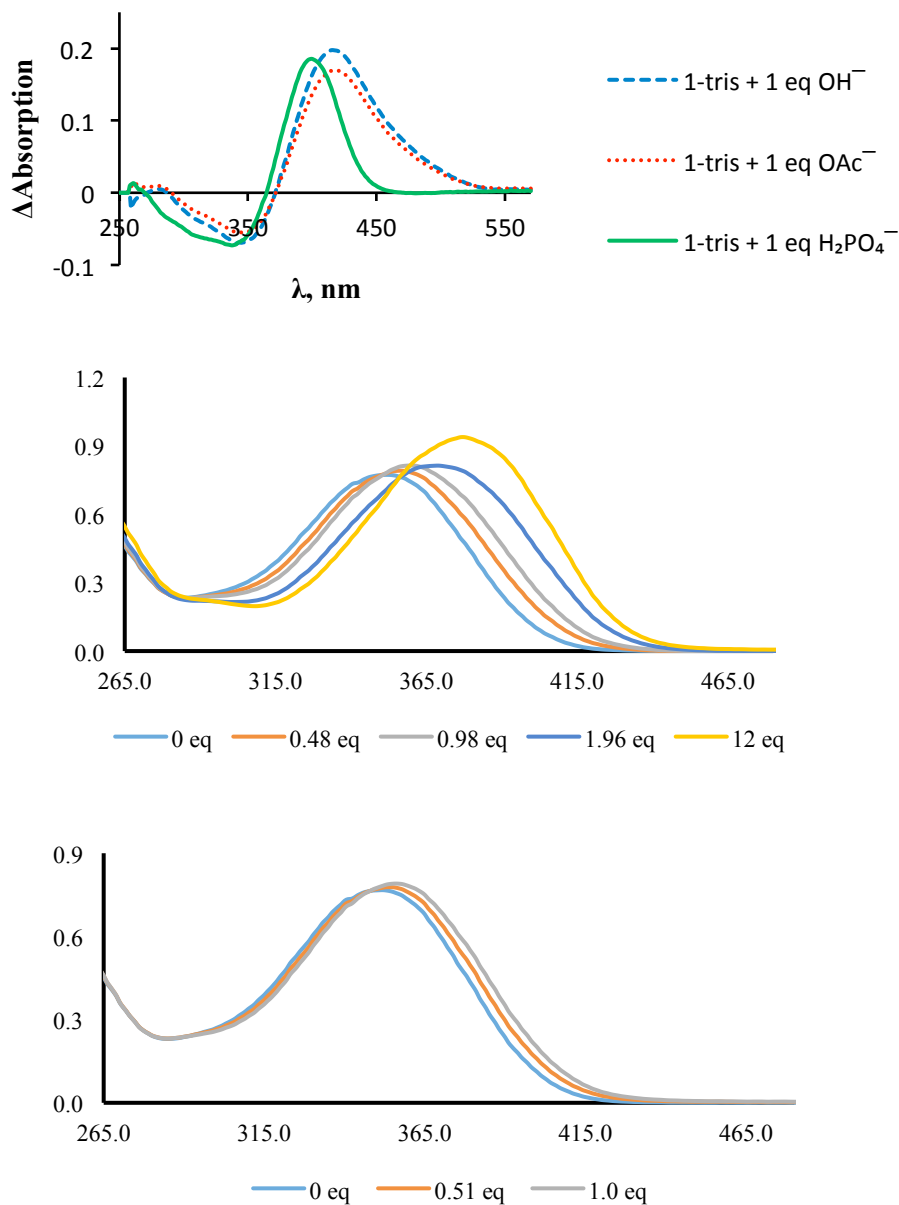

**Figure S1.** UV-visible absorbance changes upon the addition of 1 equivalent of tetrabutyl-ammonium salts of hydroxide, acetate, and dihydrogen phosphate at room temperature to 15  $\mu\text{M}$  **1-tris** in 0.5%  $\text{H}_2\text{O}$  and 99.5%  $\text{DMSO}$  (v/v) [top]. Full spectra for the addition of 0, 0.48, 0.98, 1.96 and 12 equivalents of tetrabutyl ammonium dihydrogen phosphate to **1-tris** in 0.5%/99.5%  $\text{H}_2\text{O}$  and  $\text{DMSO}$ ; the isobestic point shifts after 1 equivalent indicative of a new type of interaction [middle]. Representative spectra for the addition of 0, 0.51 and 1.00 equivalents of tetrabutyl ammonium acetate to **1-tris** in  $\text{H}_2\text{O}$  and  $\text{DMSO}$  (0.5%/99.5) [bottom].

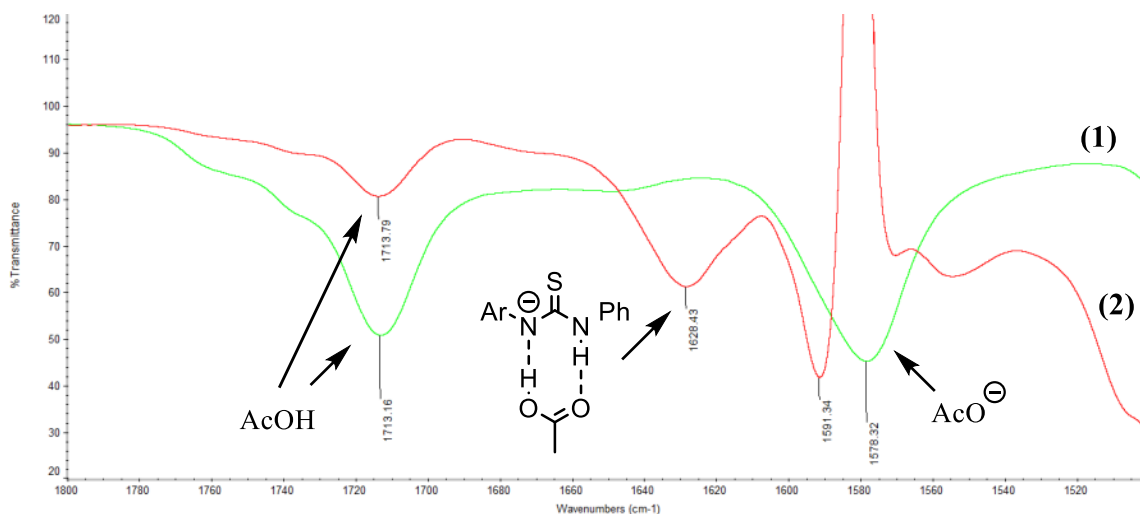

**Figure S2.** Infrared spectra were recorded in DMSO- $d_6$  with a 0.1 mm NaCl liquid cell and a Thermo Scientific Nicolette iS5 spectrometer. The results displayed from 1500-1800  $\text{cm}^{-1}$  for a 1:1 60 mM solution of HOAc and  $\text{Bu}_4\text{NOAc}$  (**1**) and a **1-mono** (60 mM) and  $\text{Bu}_4\text{NOAc}$  (90 mM) mixture (**2**) were background corrected for the solvent in both cases and tetrabutylammonium acetate in the latter spectrum.

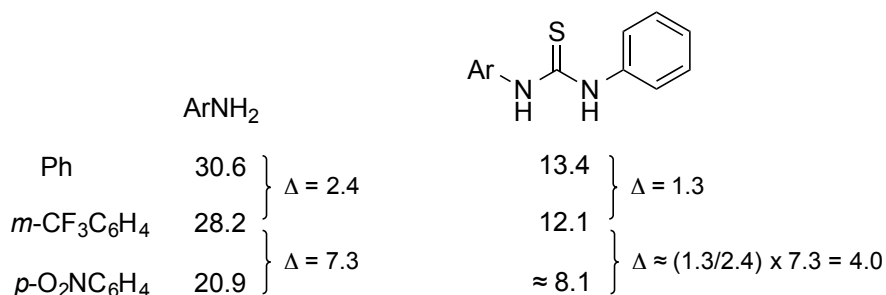

**Figure S3.** Prediction scheme for the DMSO  $\text{pK}_a$  of **1-mono** – **1-tris** based upon previously measured values<sup>40,41</sup>.

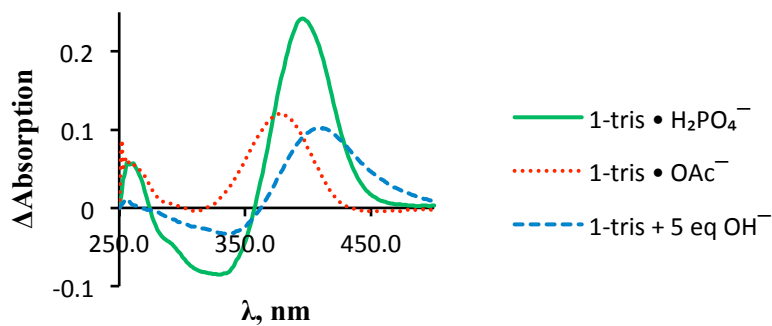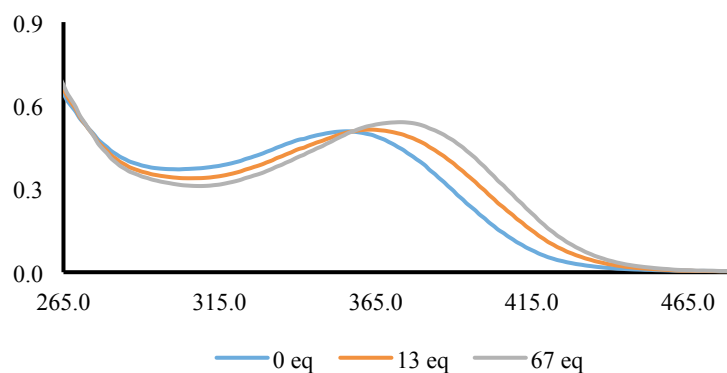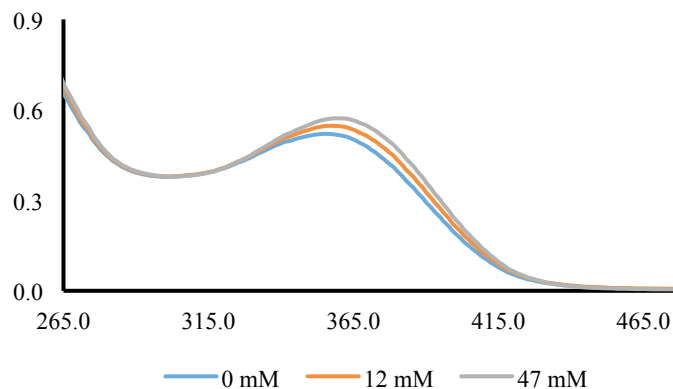

**Figure S4.** UV-visible absorbance changes upon the addition of 1 equivalent of tetrabutyl-ammonium salts of hydroxide, acetate, and dihydrogen phosphate at room temperature to 15  $\mu\text{M}$  **1-tris** in 25%  $\text{H}_2\text{O}$  and 75% DMSO (v/v) [top]. Representative UV-visible spectra for the addition of 0, 13 and 67 equivalents of tetrabutyl ammonium dihydrogen phosphate to **1-tris** in  $\text{H}_2\text{O}/\text{DMSO}$  (25%/75%) [middle]. Sample spectra obtained by adding 0, 12 and 47 mM tetrabutyl ammonium acetate to **1-tris** in 25%/75%  $\text{H}_2\text{O}$  and DMSO [bottom].

### **Binding of 1-tris with $\text{H}_2\text{PO}_4^-$ in 0.5% (v/v) aqueous DMSO.**

**Job's plot.** A 100  $\mu\text{M}$  solution of **1-tris** in 0.5%  $\text{H}_2\text{O}$ -DMSO (105  $\mu\text{L}$ ) was titrated with 0.5%  $\text{H}_2\text{O}$ -DMSO and a 100  $\mu\text{M}$  solution of tetrabutylammonium dihydrogen phosphate in 0.5%  $\text{H}_2\text{O}$ -DMSO so that the sum of the total concentrations of the two were constant (10.0  $\mu\text{M}$ ). UV absorptions at  $\lambda = 400$  nm are given in Table S1. Since  $\Delta A = A - A_0 = A_{SX}$  and  $\Delta A$  is proportional to  $[SX]$ , the binding stoichiometry is given at the maximum of a plot of  $\Delta A$  vs. anion % in the mixture, where  $A_0$  is the free receptor absorption and  $A_{SX}$  is the absorption of the bound species  $SX$ ;  $A_0 = 0.265$  for a 15  $\mu\text{M}$  solution<sup>42</sup>. The maximum was observed at 0.5 indicating that the binding mode is 1:1 (Figure S5).

**Binding isotherm.** A 15.0  $\mu\text{M}$  solution of **1-tris** in 0.5%  $\text{H}_2\text{O}$ -DMSO (2.00 mL) was titrated with a 1.61 mM (entries 1-12) followed by a 33.9 mM (entries 13-14) solution of tetrabutylammonium dihydrogen phosphate in 0.5%  $\text{H}_2\text{O}$ -DMSO at 23 °C (Table S2). A linear dependence of the absorbance versus the number of equivalents of  $\text{H}_2\text{PO}_4^-$  in the 0.0 - 0.94 range (Figure S6, left) is consistent with complete binding and leads to  $A_{\text{max}} = 0.426$ . If one assumes that  $\geq 89\%$  of the thiourea is bound when 1 equivalent  $\text{H}_2\text{PO}_4^-$  is added, then  $K \geq 5 \times 10^6 \text{ M}^{-1}$ . The change in absorption at higher concentrations of  $\text{H}_2\text{PO}_4^-$  was ascribed to deprotonation of the receptor-bound complex by free  $\text{H}_2\text{PO}_4^-$  to afford thiourea-bound  $\text{HPO}_4^{2-}$ .<sup>43</sup> Non-linear curve fitting of these data affords an apparent binding affinity  $K_{11} = 5.2 \times 10^5 \text{ M}^{-1}$  and  $A_{\text{max}} = 0.544$  (not shown) or an equilibrium constant  $K = 3.9$  and  $A_{\text{max}} = 0.548$  calculated in analogous way for this process (Figure S6, right).

**Table S1.** Job's plot data for the interaction of **1-tris** with  $\text{H}_2\text{PO}_4^-$  ( $\lambda = 400 \text{ nm}$ ).

| Entry | $\mu\text{L}$ solvent added | $\mu\text{L}$ $\text{H}_2\text{PO}_4^-$ added | $[\text{thiourea}]_0$ , $\mu\text{M}$ | $[\text{H}_2\text{PO}_4^-]_0$ , $\mu\text{M}$ | Absorption | $\Delta A$ |
|-------|-----------------------------|-----------------------------------------------|---------------------------------------|-----------------------------------------------|------------|------------|
| 1     | 1350                        | 45                                            | 7.00                                  | 3.00                                          | 0.2266     | 0.0741     |
| 2     | 67                          | 7.4                                           | 6.67                                  | 3.33                                          | 0.2268     | 0.0791     |
| 3     | 158                         | 17.6                                          | 6.00                                  | 4.00                                          | 0.2156     | 0.0774     |
| 4     | 315                         | 35.0                                          | 5.00                                  | 5.00                                          | 0.2032     | 0.0794     |
| 5     | 472                         | 52.5                                          | 4.00                                  | 6.00                                          | 0.1804     | 0.0709     |
| 6     | 475                         | 52.8                                          | 3.33                                  | 6.67                                          | 0.1641     | 0.0643     |
| 7     | 312                         | 34.7                                          | 3.00                                  | 7.00                                          | 0.1570     | 0.0618     |

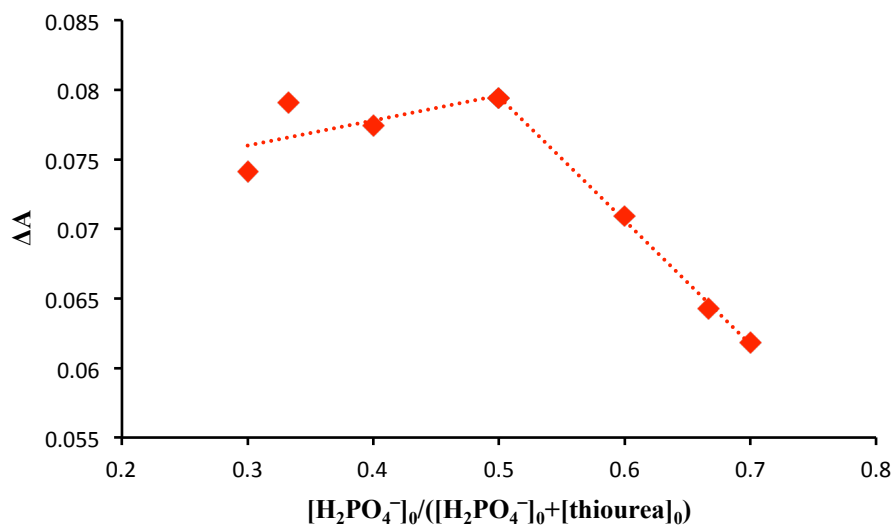

**Figure S5.** Job's plot for the interaction of **1-tris** with  $\text{H}_2\text{PO}_4^-$ .

**Table S2.** Data for the titration of **1-tris** with  $\text{H}_2\text{PO}_4^-$  in 0.5%  $\text{H}_2\text{O}$ –DMSO at 400 nm.

| Entry | $\mu\text{L H}_2\text{PO}_4^-$<br>added | [thiourea] <sub>0</sub> ,<br>$\mu\text{M}$ | $[\text{H}_2\text{PO}_4^-]_0$ ,<br>$\mu\text{M}$ | Observed<br>absorption <sup>a</sup> | Calculated<br>absorption <sup>b</sup> |
|-------|-----------------------------------------|--------------------------------------------|--------------------------------------------------|-------------------------------------|---------------------------------------|
| 0     | 0                                       | 15.00                                      | 0.00                                             | 0.2400                              | 0.2421                                |
| 1     | 3                                       | 14.98                                      | 2.41                                             | 0.2719                              | 0.2716                                |
| 2     | 5                                       | 14.96                                      | 4.01                                             | 0.2916                              | 0.2913                                |
| 3     | 7.5                                     | 14.94                                      | 6.01                                             | 0.3175                              | 0.3159                                |
| 4     | 10                                      | 14.93                                      | 8.00                                             | 0.3408                              | 0.3405                                |
| 5     | 12.5                                    | 14.91                                      | 9.99                                             | 0.3667                              | 0.3651                                |
| 6     | 15                                      | 14.89                                      | 12.0                                             | 0.3902                              | 0.3897                                |
| 7     | 17.5                                    | 14.87                                      | 13.9                                             | 0.4116                              | 0.4143                                |
| 8     | 20                                      | 14.85                                      | 15.9                                             | 0.4341                              | 0.4346                                |
| 9     | 25                                      | 14.82                                      | 19.8                                             | 0.4723                              | 0.4631                                |
| 10    | 30                                      | 14.78                                      | 23.8                                             | 0.4937                              | 0.4854                                |
| 11    | 40                                      | 14.71                                      | 31.5                                             | 0.5108                              | 0.5120                                |
| 12    | 50                                      | 14.63                                      | 39.2                                             | 0.5191                              | 0.5243                                |
| 13    | 5                                       | 14.60                                      | 121                                              | 0.5385                              | 0.5431                                |
| 14    | 10                                      | 14.56                                      | 203                                              | 0.5477                              | 0.5451                                |

<sup>a</sup> Concentration-corrected absorptions. <sup>b</sup> From the linear (entries 0-7) and non-linear (entries 8-14) curve fits.

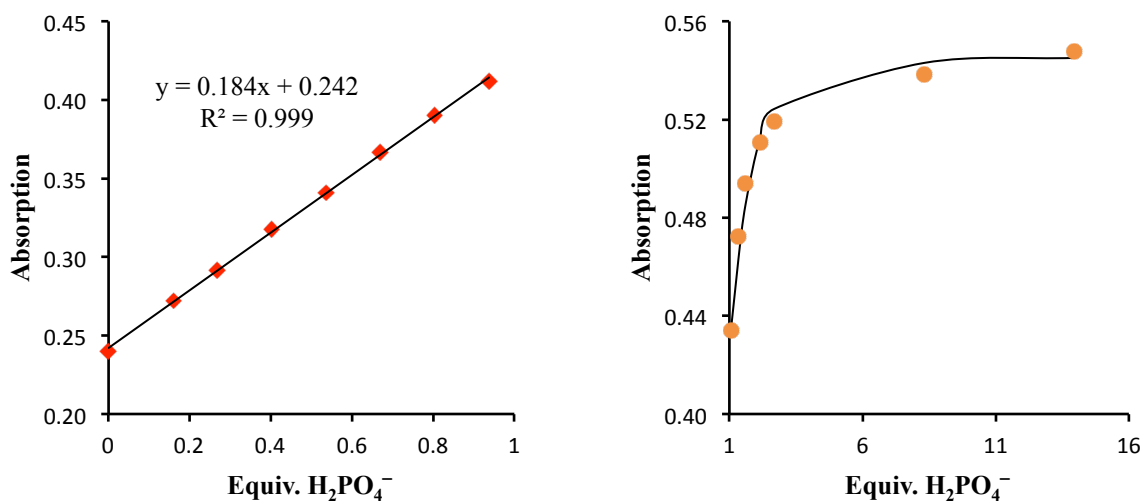

**Figure S6.** Least-squares fittings of the titration data in Table S2.

### Binding of 1-tris with OAc<sup>-</sup> in 0.5% (v/v) aqueous DMSO.

**Job's plot.** A 100  $\mu\text{M}$  solution of **1-tris** in 0.5% H<sub>2</sub>O–DMSO (105  $\mu\text{L}$ ) was titrated with 0.5% H<sub>2</sub>O–DMSO and a 100  $\mu\text{M}$  solution of tetrabutylammonium acetate in 0.5% H<sub>2</sub>O–DMSO so that the sum of the total concentrations of the two were constant (10.0  $\mu\text{M}$ ). UV absorptions at  $\lambda = 416$  nm are given in Table S3. Since  $\Delta A = A - A_0 = A_{SX}$  and  $\Delta A$  is proportional to  $[SX]$ , the binding stoichiometry is given at the maximum of a plot of  $\Delta A$  vs. anion % in the mixture, where  $A_0$  is the free receptor absorption and  $A_{SX}$  is the absorption of the bound species  $SX$ ;  $A_0 = 0.102$  for a 15  $\mu\text{M}$  solution. The maximum was observed at *ca.* 0.55 indicating that the binding mode is 1:1 and is followed by subsequent 1:2 complex formation (Figure S7).

**Titration data.** A 15  $\mu\text{M}$  solution of **1-tris** in 0.5% H<sub>2</sub>O–DMSO (2.10 mL) was titrated with a 4.31 mM solution of tetrabutylammonium acetate in 0.5% H<sub>2</sub>O–DMSO at 24 °C (Table S4). A linear dependence of the absorbance versus the number of equivalents of OAc<sup>-</sup> in the 0.0 - 1.00 range (Figure S8) is consistent with irreversible deprotonation. The spectral data is also the same as observed when 1 equivalent of tetrabutylammonium hydroxide is added. A linear least squares fit affords  $A_{\text{max}} = 0.255$ . The change in absorption at higher concentrations of OAc<sup>-</sup> was ascribed to the interaction of the other two thiourea arms and 1:2 complex formation (see Job's plot).

**Table S3.** Job's plot data for the interaction of **1-tris** with OAc<sup>-</sup>.

| Entry | $\mu\text{L}$ solvent added | $\mu\text{L}$ OAc <sup>-</sup> added | [thiourea] <sub>0</sub> , $\mu\text{M}$ | [OAc <sup>-</sup> ] <sub>0</sub> , $\mu\text{M}$ | Absorption | $\Delta A$ |
|-------|-----------------------------|--------------------------------------|-----------------------------------------|--------------------------------------------------|------------|------------|
| 1     | 1350                        | 45                                   | 7.00                                    | 3.00                                             | 0.1403     | 0.0159     |
| 2     | 67                          | 7.4                                  | 6.67                                    | 3.33                                             | 0.1391     | 0.0178     |
| 3     | 158                         | 17.6                                 | 6.00                                    | 4.00                                             | 0.1346     | 0.0201     |
| 4     | 315                         | 35.0                                 | 5.00                                    | 5.00                                             | 0.1300     | 0.0255     |
| 5     | 472                         | 52.5                                 | 4.00                                    | 6.00                                             | 0.1198     | 0.0254     |
| 6     | 475                         | 52.8                                 | 3.33                                    | 6.67                                             | 0.1103     | 0.0226     |
| 7     | 312                         | 34.7                                 | 3.00                                    | 7.00                                             | 0.1053     | 0.0212     |



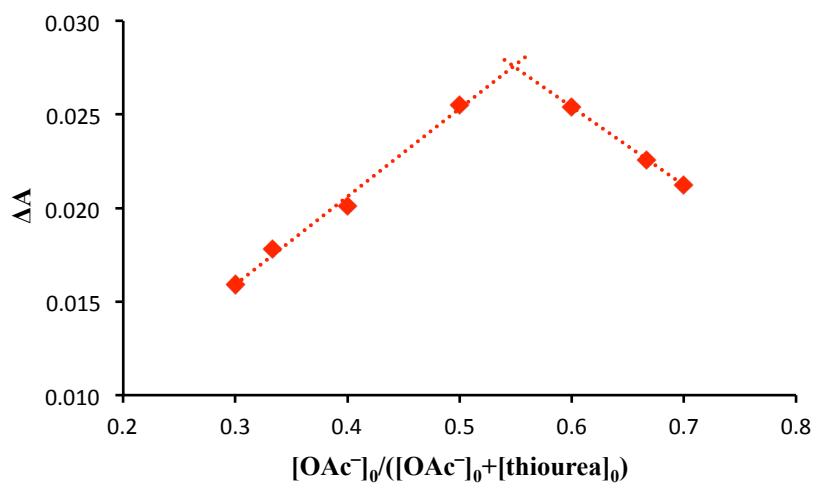

**Figure S7.** Job's plot for the interaction of **1-tris** with  $\text{OAc}^-$ .

**Table S4.** Data for the titration of **1-tris** with  $\text{OAc}^-$  in 0.5%  $\text{H}_2\text{O}$ –DMSO at 416 nm.

| Entry | $\mu\text{L OAc}^-$<br>added | $[\text{thiourea}]_0,$<br>$\mu\text{M}$ | $[\text{OAc}^-]_0,$<br>$\mu\text{M}$ | Observed<br>absorption <sup>a</sup> | Calculated<br>absorption <sup>b</sup> |
|-------|------------------------------|-----------------------------------------|--------------------------------------|-------------------------------------|---------------------------------------|
| 0     | 0                            | 15.00                                   | 0.0                                  | 0.0895                              | 0.0894                                |
| 1     | 2                            | 14.99                                   | 4.3                                  | 0.1367                              | 0.1371                                |
| 2     | 3                            | 14.98                                   | 6.4                                  | 0.1599                              | 0.1609                                |
| 3     | 4                            | 14.97                                   | 8.6                                  | 0.1847                              | 0.1847                                |
| 4     | 5                            | 14.96                                   | 10.7                                 | 0.2091                              | 0.2085                                |
| 5     | 6                            | 14.96                                   | 12.9                                 | 0.2323                              | 0.2324                                |
| 6     | 7                            | 14.95                                   | 15.0                                 | 0.2543                              | 0.2562                                |
| 7     | 8.5                          | 14.94                                   | 18.2                                 | 0.2848                              |                                       |
| 8     | 10                           | 14.93                                   | 21.4                                 | 0.3177                              |                                       |
| 9     | 12                           | 14.91                                   | 25.7                                 | 0.3454                              |                                       |
| 10    | 14                           | 14.90                                   | 29.9                                 | 0.3683                              |                                       |
| 11    | 16                           | 14.88                                   | 34.2                                 | 0.3888                              |                                       |
| 12    | 18                           | 14.87                                   | 38.4                                 | 0.4024                              |                                       |
| 13    | 21                           | 14.84                                   | 44.7                                 | 0.4111                              |                                       |
| 14    | 25                           | 14.82                                   | 53.1                                 | 0.4182                              |                                       |
| 15    | 30                           | 14.78                                   | 63.6                                 | 0.4257                              |                                       |

<sup>a</sup> Concentration-corrected absorptions. <sup>b</sup> From the linear fit.

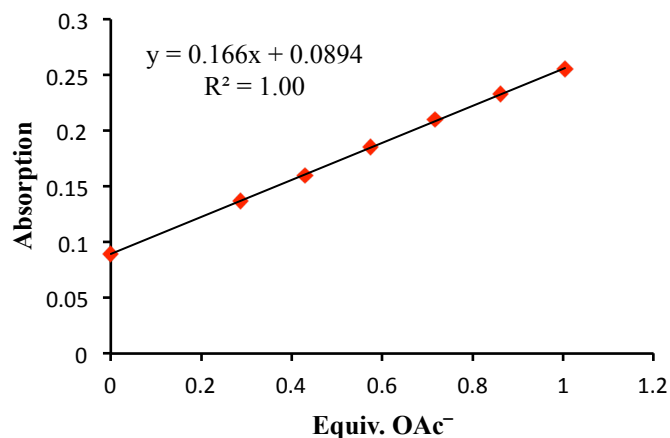

**Figure S8.** Linear least squares fitting of the titration data in Table S4.

**Binding of 1-mono with H<sub>2</sub>PO<sub>4</sub><sup>-</sup> in 0.5% (v/v) aqueous DMSO.** A 14.3 μM solution of **1-mono** in 0.5% H<sub>2</sub>O–DMSO (2.10 mL) was titrated with a 30.0 mM solution of tetrabutylammonium dihydrogen phosphate in 0.5% H<sub>2</sub>O–DMSO at 23 °C (Table S5). Non-linear curve fitting of the titration data affords  $K = 4.0 \times 10^4 \text{ M}^{-1}$  and  $A_{\text{max}} = 0.205$  (Figure S9).

**Binding of 1-mono with OAc<sup>-</sup> in 0.5% (v/v) aqueous DMSO.** To a 30 μM solution of **1-mono** in 0.5% H<sub>2</sub>O–DMSO (2.00 mL) was added a 5.0 mM solution of tetrabutylammonium hydroxide in 0.5% MeOH–DMSO (12.0 μL, 1.00 equiv.) followed by a 5.00 mM acetic acid solution in DMSO (12.0 μL, 1.00 equiv.). Less than a 10% change was observed after addition of the acetic acid indicating that little if any proton transfer takes place from the acid.

**Table S5.** Data for the titration of **1-mono** with  $\text{H}_2\text{PO}_4^-$  in 0.5%  $\text{H}_2\text{O}$ –DMSO at 454 nm.

| Entry | $\mu\text{L H}_2\text{PO}_4^-$<br>added | $[\text{thiourea}]_0,$<br>$\mu\text{M}$ | $[\text{H}_2\text{PO}_4^-]_0,$<br>$\mu\text{M}$ | Observed<br>absorption | Calculated<br>absorption <sup>a</sup> |
|-------|-----------------------------------------|-----------------------------------------|-------------------------------------------------|------------------------|---------------------------------------|
| 0     | 0                                       | 14.3                                    | 0.0                                             | 0.0315                 | 0.0315                                |
| 1     | 1                                       | 14.3                                    | 14.3                                            | 0.0835                 | 0.0819                                |
| 2     | 2                                       | 14.3                                    | 28.5                                            | 0.1126                 | 0.1129                                |
| 3     | 3                                       | 14.3                                    | 42.8                                            | 0.1316                 | 0.1325                                |
| 4     | 4                                       | 14.3                                    | 57.0                                            | 0.1451                 | 0.1456                                |
| 5     | 5                                       | 14.3                                    | 71.3                                            | 0.1547                 | 0.1548                                |
| 6     | 7                                       | 14.2                                    | 99.7                                            | 0.1668                 | 0.1668                                |
| 7     | 10                                      | 14.2                                    | 142                                             | 0.1767                 | 0.1767                                |
| 8     | 15                                      | 14.2                                    | 212                                             | 0.1866                 | 0.1848                                |
| 9     | 20                                      | 14.2                                    | 283                                             | 0.1885                 | 0.1889                                |
| 10    | 30                                      | 14.1                                    | 423                                             | 0.1929                 | 0.1926                                |
| 11    | 50                                      | 14.0                                    | 698                                             | 0.1936                 | 0.1946                                |

<sup>a</sup> From the non-linear curve fit.

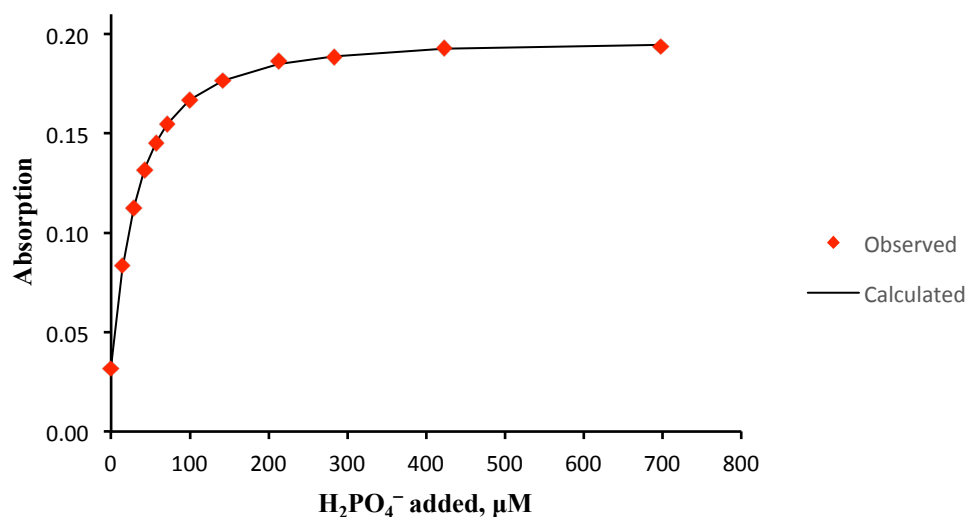

**Figure S9.** Non-linear least squares fitting of the titration data in Table S5.

**Binding of 1-tris with  $\text{H}_2\text{PO}_4^-$  in 5% (v/v) aqueous DMSO.** A 15  $\mu\text{M}$  solution of **1-tris** in 5%  $\text{H}_2\text{O}$ –DMSO (2.00 mL) was titrated with a 2.14 mM solution of tetrabutylammonium dihydrogen phosphate in 5%  $\text{H}_2\text{O}$ –DMSO at 24 °C (Table S6). Non-linear curve fitting of the titration data affords  $K = 2.3 \times 10^5 \text{ M}^{-1}$  and  $A_{\text{max}} = 0.549$  (Figure S10).

**Table S6.** Data for the titration of **1-tris** with  $\text{H}_2\text{PO}_4^-$  in 5%  $\text{H}_2\text{O}$ -DMSO at 399 nm.

| Entry | $\mu\text{L H}_2\text{PO}_4^-$<br>added | $[\text{thiourea}]_0,$<br>$\mu\text{M}$ | $[\text{H}_2\text{PO}_4^-]_0,$<br>$\mu\text{M}$ | Observed<br>absorption | Calculated<br>absorption <sup>a</sup> |
|-------|-----------------------------------------|-----------------------------------------|-------------------------------------------------|------------------------|---------------------------------------|
| 0     | 0                                       | 15.00                                   | 0                                               | 0.2619                 | 0.2619                                |
| 1     | 1                                       | 14.99                                   | 1.07                                            | 0.2753                 | 0.2774                                |
| 2     | 2                                       | 14.99                                   | 2.13                                            | 0.2901                 | 0.2924                                |
| 3     | 3.5                                     | 14.97                                   | 3.73                                            | 0.3122                 | 0.3141                                |
| 4     | 5                                       | 14.96                                   | 5.33                                            | 0.3282                 | 0.3345                                |
| 5     | 7.5                                     | 14.94                                   | 7.98                                            | 0.3573                 | 0.3656                                |
| 6     | 10                                      | 14.93                                   | 10.6                                            | 0.3841                 | 0.3925                                |
| 7     | 12.5                                    | 14.91                                   | 13.3                                            | 0.4104                 | 0.4152                                |
| 8     | 15                                      | 14.89                                   | 15.9                                            | 0.4346                 | 0.4338                                |
| 9     | 17.5                                    | 14.87                                   | 18.5                                            | 0.4532                 | 0.4489                                |
| 10    | 20                                      | 14.85                                   | 21.2                                            | 0.4691                 | 0.4609                                |
| 11    | 25                                      | 14.82                                   | 26.4                                            | 0.4862                 | 0.4781                                |
| 12    | 30                                      | 14.78                                   | 31.6                                            | 0.4933                 | 0.4893                                |
| 13    | 40                                      | 14.71                                   | 41.9                                            | 0.4996                 | 0.5016                                |
| 14    | 50                                      | 14.63                                   | 52.1                                            | 0.5019                 | 0.5075                                |

<sup>a</sup> From the non-linear curve fit.

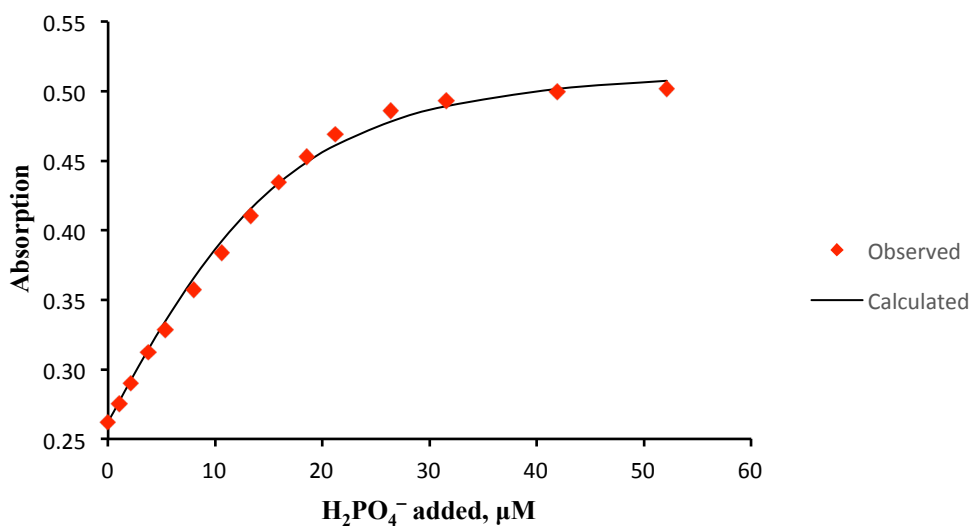

**Figure S10.** Non-linear least squares fitting of the titration data in Table S6.

**Binding of 1-tris with OAc<sup>-</sup> in 5% (v/v) aqueous DMSO.** A 15  $\mu\text{M}$  solution of **1-tris** in 0.5% H<sub>2</sub>O–DMSO (2.10 mL) was titrated with a 4.31 mM solution of tetrabutylammonium acetate in 0.5% H<sub>2</sub>O–DMSO at 24 °C (Table S7). A linear dependence of the absorbance versus the number of equivalents of acetate in the 0.0 - 0.93 range (Figure S11) is consistent with irreversible deprotonation and the linear least square fit afforded  $A_{\text{max}} = 0.272$ . The change in absorption at higher OAc<sup>-</sup> concentrations was ascribed to sequential binding or deprotonation (1:2) upon interaction with the remaining two thiourea arms.

**Table S7.** Data for the titration of **1-tris** with OAc<sup>-</sup> in 5% H<sub>2</sub>O–DMSO at 411 nm.

| Entry | $\mu\text{L OAc}^-$<br>added | [thiourea] <sub>0</sub> ,<br>$\mu\text{M}$ | [OAc <sup>-</sup> ] <sub>0</sub> ,<br>$\mu\text{M}$ | Observed<br>absorption <sup>a</sup> | Calculated<br>absorption <sup>b</sup> |
|-------|------------------------------|--------------------------------------------|-----------------------------------------------------|-------------------------------------|---------------------------------------|
| 0     | 0                            | 15.00                                      | 0.0                                                 | 0.1314                              | 0.1346                                |
| 1     | 2                            | 14.99                                      | 4.7                                                 | 0.1790                              | 0.1772                                |
| 2     | 3                            | 14.98                                      | 7.0                                                 | 0.2010                              | 0.1985                                |
| 3     | 4                            | 14.97                                      | 9.3                                                 | 0.2215                              | 0.2198                                |
| 4     | 5                            | 14.96                                      | 11.7                                                | 0.2428                              | 0.2411                                |
| 5     | 6                            | 14.96                                      | 14.0                                                | 0.2582                              | 0.2625                                |
| 6     | 7                            | 14.95                                      | 16.3                                                | 0.2749                              |                                       |
| 7     | 8.5                          | 14.94                                      | 19.8                                                | 0.2919                              |                                       |
| 8     | 10                           | 14.93                                      | 23.2                                                | 0.3065                              |                                       |
| 9     | 13                           | 14.90                                      | 30.2                                                | 0.3291                              |                                       |
| 10    | 16                           | 14.88                                      | 37.1                                                | 0.3425                              |                                       |
| 11    | 20                           | 14.85                                      | 46.3                                                | 0.3545                              |                                       |
| 12    | 25                           | 14.82                                      | 57.7                                                | 0.3622                              |                                       |
| 13    | 30                           | 14.78                                      | 69.1                                                | 0.3688                              |                                       |
| 14    | 40                           | 14.71                                      | 91.6                                                | 0.3755                              |                                       |

<sup>a</sup> Concentration-corrected absorptions. <sup>b</sup> From the linear fit.

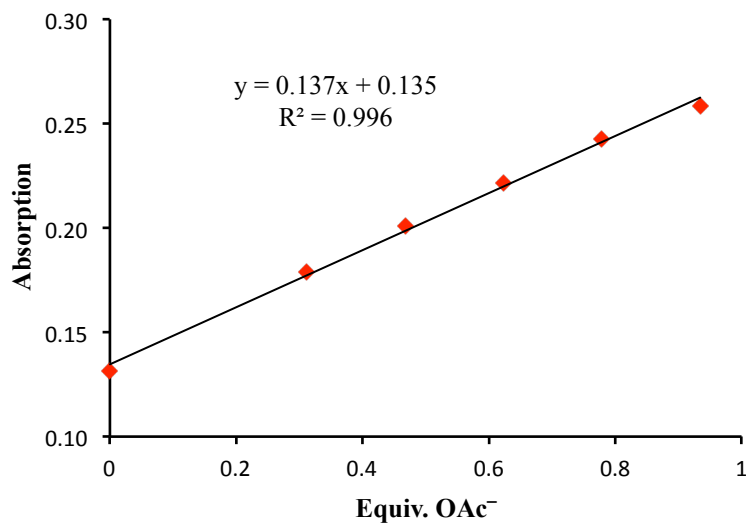

**Figure S11.** Linear least squares fitting of the titration data in Table S7.

**Binding of 1-tris with H<sub>2</sub>PO<sub>4</sub><sup>-</sup> in 12.5% (v/v) aqueous DMSO.** A 15 μM solution of **1-tris** in 12.5% H<sub>2</sub>O–DMSO (2.00 mL) was titrated with a 16.1 mM solution of tetrabutylammonium dihydrogen phosphate in 12.5% H<sub>2</sub>O–DMSO at 24 °C (Table S8). Non-linear curve fitting of the titration data affords  $K = 7.5 \times 10^4 \text{ M}^{-1}$  and  $A_{\text{max}} = 0.544$  (Figure S12).

**Binding of 1-tris with OAc<sup>-</sup> in 12.5% (v/v) aqueous DMSO.** A 15 μM solution of **1-tris** in 12.5% H<sub>2</sub>O–DMSO (2.00 mL) was titrated with a 3.81 mM solution of tetrabutylammonium acetate in 12.5% H<sub>2</sub>O–DMSO at 23 °C (Table S9). The wavelength of the maximum change in the concentration-corrected absorption of the thiourea shifted from  $\lambda = 413 \text{ nm}$  to 406 nm and the titration data was not fit to a binding curve.

**Table S8.** Data for the titration of **1-tris** with  $\text{H}_2\text{PO}_4^-$  in 12.5%  $\text{H}_2\text{O}$ –DMSO at 397 nm.

| Entry | $\mu\text{L H}_2\text{PO}_4^-$<br>added | $[\text{thiourea}]_0,$<br>$\mu\text{M}$ | $[\text{H}_2\text{PO}_4^-]_0,$<br>$\mu\text{M}$ | Observed<br>absorption | Calculated<br>absorption <sup>a</sup> |
|-------|-----------------------------------------|-----------------------------------------|-------------------------------------------------|------------------------|---------------------------------------|
| 0     | 0                                       | 15.0                                    | 0                                               | 0.2608                 | 0.2608                                |
| 1     | 1                                       | 15.0                                    | 8.03                                            | 0.3315                 | 0.3298                                |
| 2     | 2                                       | 15.0                                    | 16.1                                            | 0.3761                 | 0.3792                                |
| 3     | 3                                       | 15.0                                    | 24.1                                            | 0.4086                 | 0.4135                                |
| 4     | 4                                       | 15.0                                    | 32.1                                            | 0.4386                 | 0.4374                                |
| 5     | 5                                       | 15.0                                    | 40.1                                            | 0.4563                 | 0.4545                                |
| 6     | 7.5                                     | 14.9                                    | 60.1                                            | 0.4865                 | 0.4804                                |
| 7     | 10                                      | 14.9                                    | 80.0                                            | 0.4968                 | 0.4944                                |
| 8     | 15                                      | 14.9                                    | 119                                             | 0.5067                 | 0.5085                                |
| 9     | 20                                      | 14.9                                    | 159                                             | 0.5123                 | 0.5150                                |
| 10    | 30                                      | 14.8                                    | 237                                             | 0.5162                 | 0.5203                                |
| 11    | 130                                     | 14.1                                    | 981                                             | 0.5086                 | 0.5075                                |
| 12    | 230                                     | 13.5                                    | 1658                                            | 0.4880                 | 0.4862                                |

<sup>a</sup> From the non-linear curve fit.

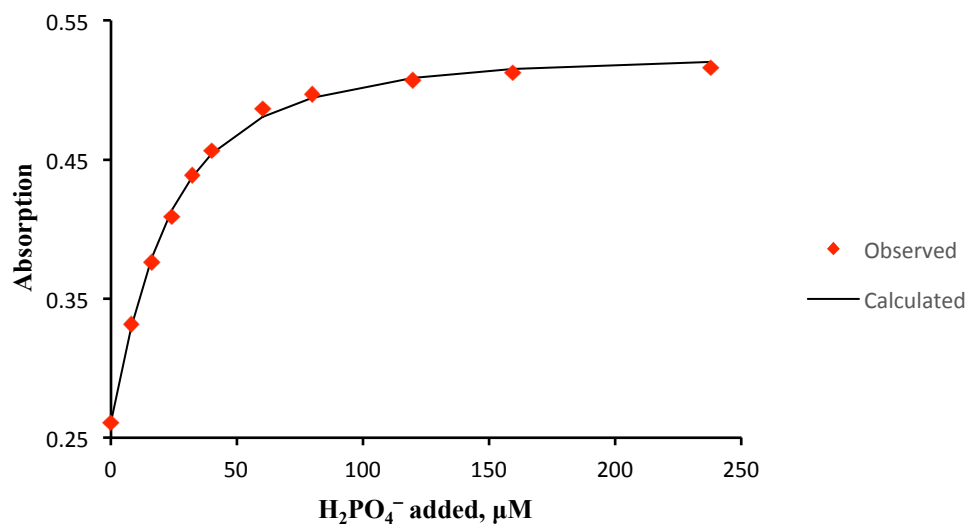

**Figure S12.** Non-linear least squares fitting of the titration data in Table S8.

**Table S9.** Data for the titration of **1-tris** with  $\text{OAc}^-$  in 12.5%  $\text{H}_2\text{O}$ –DMSO at 413 nm.

| Entry | $\mu\text{L OAc}^-$<br>added | $[\text{thiourea}]_0,$<br>$\mu\text{M}$ | $[\text{OAc}^-]_0,$<br>$\mu\text{M}$ | Observed<br>absorption |
|-------|------------------------------|-----------------------------------------|--------------------------------------|------------------------|
| 0     | 0                            | 15.00                                   | 0.1153                               | 0.1153                 |
| 1     | 2                            | 14.99                                   | 0.1362                               | 0.1362                 |
| 2     | 3.5                          | 14.97                                   | 0.1490                               | 0.1490                 |
| 3     | 5                            | 14.96                                   | 0.1579                               | 0.1579                 |
| 4     | 6.5                          | 14.95                                   | 0.1667                               | 0.1667                 |
| 5     | 8                            | 14.94                                   | 0.1726                               | 0.1726                 |
| 6     | 10                           | 14.93                                   | 0.1791                               | 0.1791                 |
| 7     | 15                           | 14.89                                   | 0.1900                               | 0.1900                 |
| 8     | 20                           | 14.85                                   | 0.1985                               | 0.1985                 |
| 9     | 30                           | 14.78                                   | 0.2070                               | 0.2070                 |
| 10    | 40                           | 14.71                                   | 0.2111                               | 0.2111                 |
| 11    | 60                           | 14.56                                   | 0.2148                               | 0.2148                 |
| 12    | 80                           | 14.42                                   | 0.2143                               | 0.2143                 |

**Binding of 1-tris with  $\text{H}_2\text{PO}_4^-$  in 20% (v/v) aqueous DMSO.** A 15  $\mu\text{M}$  solution of **1-tris** in 20%  $\text{H}_2\text{O}$ –DMSO (2.00 mL) was titrated with a 16.1 mM solution of tetrabutylammonium dihydrogen phosphate in 20%  $\text{H}_2\text{O}$ –DMSO at 24 °C (Table S10). Non-linear curve fitting of the titration data affords  $K = 1.5 \times 10^4 \text{ M}^{-1}$  and  $A_{\text{max}} = 0.465$  (Figure S13).



**Table S10.** Data for the titration of **1-tris** with  $\text{H}_2\text{PO}_4^-$  in 20%  $\text{H}_2\text{O}$ –DMSO at 397 nm.

| Entry | $\mu\text{L H}_2\text{PO}_4^-$<br>added | [thiourea] <sub>0</sub> ,<br>$\mu\text{M}$ | [ $\text{H}_2\text{PO}_4^-$ ] <sub>0</sub> ,<br>$\mu\text{M}$ | Observed<br>absorption | Calculated<br>absorption <sup>a</sup> |
|-------|-----------------------------------------|--------------------------------------------|---------------------------------------------------------------|------------------------|---------------------------------------|
| 0     | 0                                       | 15.00                                      | 0                                                             | 0.2468                 | 0.2468                                |
| 1     | 1                                       | 14.99                                      | 7.73                                                          | 0.2712                 | 0.2662                                |
| 2     | 2                                       | 14.99                                      | 15.5                                                          | 0.2874                 | 0.2829                                |
| 3     | 3.5                                     | 14.97                                      | 27.0                                                          | 0.3080                 | 0.3036                                |
| 4     | 5                                       | 14.96                                      | 38.6                                                          | 0.3216                 | 0.3204                                |
| 5     | 7.5                                     | 14.94                                      | 57.8                                                          | 0.3412                 | 0.3419                                |
| 6     | 10                                      | 14.93                                      | 77.0                                                          | 0.3559                 | 0.3578                                |
| 7     | 12.5                                    | 14.91                                      | 96.1                                                          | 0.3676                 | 0.3700                                |
| 8     | 15                                      | 14.89                                      | 115                                                           | 0.3755                 | 0.3795                                |
| 9     | 20                                      | 14.85                                      | 153                                                           | 0.3923                 | 0.3932                                |
| 10    | 25                                      | 14.82                                      | 191                                                           | 0.4019                 | 0.4024                                |
| 11    | 30                                      | 14.78                                      | 229                                                           | 0.4096                 | 0.4090                                |
| 12    | 40                                      | 14.71                                      | 303                                                           | 0.4176                 | 0.4172                                |
| 13    | 50                                      | 14.63                                      | 377                                                           | 0.4228                 | 0.4218                                |
| 14    | 70                                      | 14.49                                      | 523                                                           | 0.4269                 | 0.4258                                |
| 15    | 90                                      | 14.35                                      | 666                                                           | 0.4273                 | 0.4265                                |

<sup>a</sup> From the non-linear curve fit.

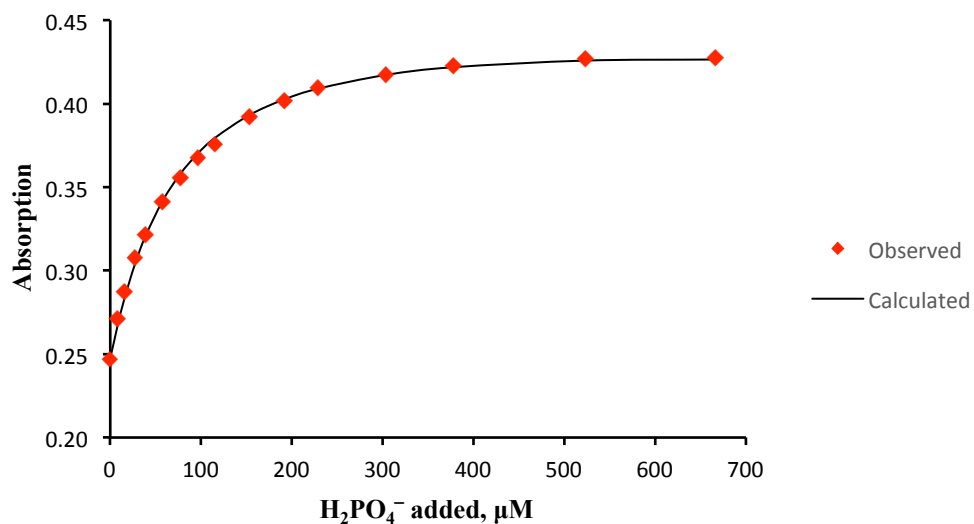

**Figure S13.** Non-linear least squares fitting of the titration data in Table S10.

**Binding of 1-tris with OAc<sup>-</sup> in 20% (v/v) aqueous DMSO.** A 15  $\mu\text{M}$  solution of **1-tris** in 20% H<sub>2</sub>O–DMSO (2.00 mL) was titrated with a 219 mM solution of tetrabutylammonium acetate in 20% H<sub>2</sub>O–DMSO containing 15  $\mu\text{M}$  of **1-tris** at 22 °C (Table S11). The wavelength of the maximum change in the concentration-corrected absorption of the thiourea shifted from  $\lambda = 406$  nm to 384 nm and the titration data could not be fit to a 1:1 binding curve.

**Table S11.** Data for the titration of **1-tris** with OAc<sup>-</sup> in 20% H<sub>2</sub>O–DMSO at 384 nm.

| Entry | $\mu\text{L}$ OAc <sup>-</sup> added | [thiourea] <sub>0</sub> , mM | [OAc <sup>-</sup> ] <sub>0</sub> , mM | Observed absorption |
|-------|--------------------------------------|------------------------------|---------------------------------------|---------------------|
| 0     | 0                                    | 0.0150                       | 0                                     | 0.4171              |
| 1     | 1                                    | 0.0150                       | 0.11                                  | 0.4269              |
| 2     | 2                                    | 0.0150                       | 0.22                                  | 0.4284              |
| 3     | 3                                    | 0.0150                       | 0.33                                  | 0.4293              |
| 4     | 5                                    | 0.0150                       | 0.55                                  | 0.4302              |
| 5     | 10                                   | 0.0149                       | 1.09                                  | 0.4340              |
| 6     | 20                                   | 0.0149                       | 2.17                                  | 0.4443              |
| 7     | 40                                   | 0.0147                       | 4.29                                  | 0.4517              |
| 8     | 60                                   | 0.0146                       | 6.37                                  | 0.4579              |
| 9     | 100                                  | 0.0143                       | 10.41                                 | 0.4663              |
| 10    | 150                                  | 0.0140                       | 15.26                                 | 0.4731              |
| 11    | 200                                  | 0.0136                       | 19.88                                 | 0.4806              |
| 12    | 300                                  | 0.0130                       | 28.53                                 | 0.4903              |
| 13    | 400                                  | 0.0125                       | 36.45                                 | 0.4959              |
| 14    | 600                                  | 0.0115                       | 50.48                                 | 0.5072              |
| 15    | 760                                  | 0.0109                       | 60.24                                 | 0.5119              |

**Binding of 1-tris with H<sub>2</sub>PO<sub>4</sub><sup>-</sup> in 25% (v/v) aqueous DMSO.** A 15  $\mu\text{M}$  solution of **1-tris** in 25% H<sub>2</sub>O–DMSO (2.00 mL) was titrated with a 40.0 mM solution of tetrabutylammonium dihydrogen phosphate in 25% H<sub>2</sub>O–DMSO at 24 °C (Table S12). Non-linear curve fitting of the titration data affords  $K = 4000 \text{ M}^{-1}$  and  $A_{\text{max}} = 0.477$  (Figure S14).

**Table S12.** Data for the titration of **1-tris** with  $\text{H}_2\text{PO}_4^-$  in 25%  $\text{H}_2\text{O}$ –DMSO at 395 nm.

| Entry | $\mu\text{L H}_2\text{PO}_4^-$<br>added | [thiourea] $_0$ ,<br>$\mu\text{M}$ | [ $\text{H}_2\text{PO}_4^-$ ] $_0$ ,<br>$\mu\text{M}$ | Observed<br>absorption | Calculated<br>absorption <sup>a</sup> |
|-------|-----------------------------------------|------------------------------------|-------------------------------------------------------|------------------------|---------------------------------------|
| 0     | 0                                       | 15                                 | 0                                                     | 0.2398                 | 0.2398                                |
| 1     | 2.5                                     | 14.98                              | 49.8                                                  | 0.2807                 | 0.2774                                |
| 2     | 5                                       | 14.96                              | 99.6                                                  | 0.3056                 | 0.3048                                |
| 3     | 7.5                                     | 14.94                              | 149                                                   | 0.3244                 | 0.3254                                |
| 4     | 10                                      | 14.92                              | 199                                                   | 0.3408                 | 0.3414                                |
| 5     | 12.5                                    | 14.91                              | 248                                                   | 0.3528                 | 0.3542                                |
| 6     | 15                                      | 14.89                              | 297                                                   | 0.3647                 | 0.3646                                |
| 7     | 20                                      | 14.85                              | 395                                                   | 0.3804                 | 0.3802                                |
| 8     | 25                                      | 14.82                              | 493                                                   | 0.3919                 | 0.3914                                |
| 9     | 30                                      | 14.78                              | 590                                                   | 0.3993                 | 0.3997                                |
| 10    | 40                                      | 14.71                              | 783                                                   | 0.4110                 | 0.4109                                |
| 11    | 50                                      | 14.63                              | 974                                                   | 0.4182                 | 0.4177                                |

<sup>a</sup> From the non-linear curve fit.

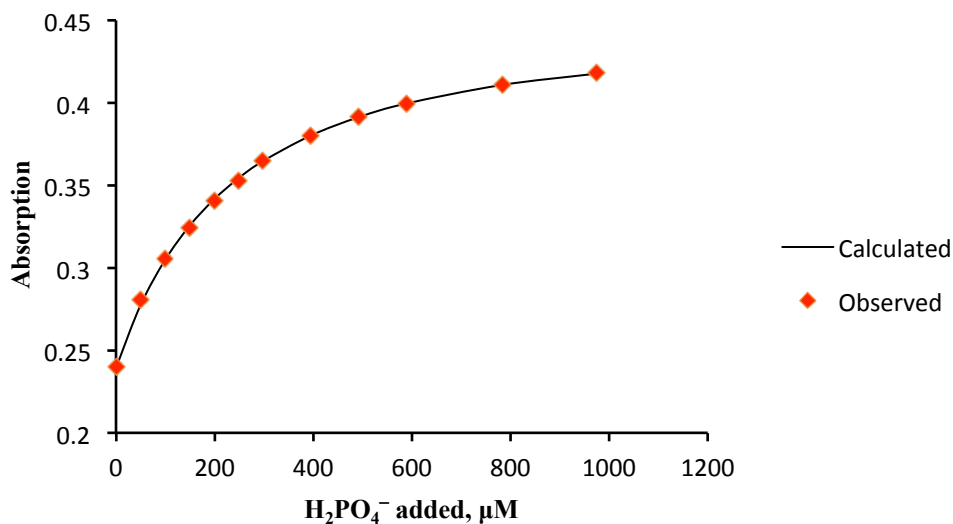

**Figure S14.** Non-linear least squares fitting of the titration data in Table S12.

**Binding of 1-tris with OAc<sup>-</sup> in 25% (v/v) aqueous DMSO.** A 15  $\mu$ M solution of **1-tris** in 25% H<sub>2</sub>O–DMSO (2.00 mL) was titrated with a 0.513 M solution of tetrabutylammonium acetate in 25% H<sub>2</sub>O–DMSO at 24 °C (Table S13). A linear least squares fit in the single-reciprocal plot affords  $K = 35 \text{ M}^{-1}$  and  $\Delta A_{\text{max}} = 0.120$  (Figure S15, entries 1–14, 8-62% bound (i.e.,  $\Delta A/\Delta A_{\text{max}}$ ); deviation was observed thereafter presumably due to sequential 1:2 binding).

**Table S13.** Data for the titration of **1-tris** with OAc<sup>-</sup> in 25% H<sub>2</sub>O–DMSO at 379 nm.

| Entry | $\mu\text{L OAc}^-$<br>added | $[\text{OAc}^-]_0, \text{M}$ | Observed<br>absorption | $\Delta A_{\text{cor}}$ | $\Delta A_{\text{cor}}/[\text{OAc}^-]_0$ |
|-------|------------------------------|------------------------------|------------------------|-------------------------|------------------------------------------|
| 0     | 0                            | 0                            | 0.4075                 | –                       | –                                        |
| 1     | 10                           | 0.00255                      | 0.4153                 | 0.0099                  | 3.873                                    |
| 2     | 15                           | 0.00381                      | 0.4182                 | 0.0139                  | 3.641                                    |
| 3     | 20                           | 0.00507                      | 0.4213                 | 0.0180                  | 3.542                                    |
| 4     | 25                           | 0.00632                      | 0.4236                 | 0.0213                  | 3.376                                    |
| 5     | 30                           | 0.00757                      | 0.4264                 | 0.0253                  | 3.343                                    |
| 6     | 35                           | 0.00881                      | 0.4283                 | 0.0283                  | 3.213                                    |
| 7     | 40                           | 0.01004                      | 0.4299                 | 0.0310                  | 3.083                                    |
| 8     | 50                           | 0.01249                      | 0.4341                 | 0.0375                  | 2.999                                    |
| 9     | 60                           | 0.01492                      | 0.4349                 | 0.0404                  | 2.708                                    |
| 10    | 80                           | 0.01970                      | 0.4394                 | 0.0495                  | 2.511                                    |
| 11    | 100                          | 0.02439                      | 0.4408                 | 0.0553                  | 2.267                                    |
| 12    | 125                          | 0.03013                      | 0.4412                 | 0.0612                  | 2.031                                    |
| 13    | 150                          | 0.03574                      | 0.4401                 | 0.0656                  | 1.835                                    |
| 14    | 200                          | 0.04657                      | 0.4381                 | 0.0744                  | 1.597                                    |
| 15    | 300                          | 0.06683                      | 0.4315                 | 0.0887                  | 1.327                                    |
| 16    | 400                          | 0.08539                      | 0.4207                 | 0.0972                  | 1.138                                    |

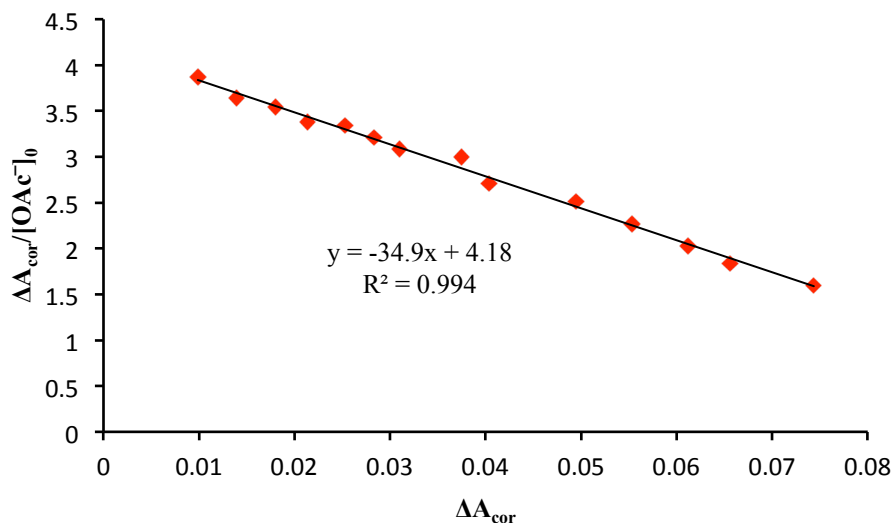

**Figure S15.** Linear least squares fitting of the titration data in Table S13.

**Binding of 1-tris with  $\text{Cl}^-$  in 25% (v/v) aqueous DMSO.** A 15  $\mu\text{M}$  solution of 1-tris in 25%  $\text{H}_2\text{O}$ –DMSO (2.00 mL) was titrated with solid tetrabutylammonium chloride at 24 °C (Table S14). The volume change was calculated based on the density of TBACl (i.e., 0.98 g/mL). A linear least squares fit of the single-reciprocal plot affords  $K = 1.5 \text{ M}^{-1}$  and  $\Delta A_{\text{max}} = 0.298$  (Figure S16, 12-66% bound (i.e.,  $\Delta A/\Delta A_{\text{max}}$ )).

**Table S14.** Data for the titration of 1-tris with  $\text{Cl}^-$  in 25%  $\text{H}_2\text{O}$ –DMSO at 363 nm.

| Entry | mg TBACl added | $[\text{Cl}^-]_0$ , M | Observed absorption | $\Delta A_{\text{cor}}$ | $\Delta A_{\text{cor}}/[\text{Cl}^-]_0$ |
|-------|----------------|-----------------------|---------------------|-------------------------|-----------------------------------------|
| 0     | 0              | 0                     | 0.5324              | –                       | –                                       |
| 1     | 50.7           | 0.0888                | 0.5550              | 0.0369                  | 0.4153                                  |
| 2     | 103.7          | 0.1770                | 0.5662              | 0.0637                  | 0.3598                                  |
| 3     | 193.7          | 0.3167                | 0.5706              | 0.0945                  | 0.2985                                  |
| 4     | 362.7          | 0.5500                | 0.5629              | 0.1345                  | 0.2445                                  |
| 5     | 632.4          | 0.8593                | 0.5311              | 0.1698                  | 0.1976                                  |
| 6     | 966.4          | 1.163                 | 0.4879              | 0.1956                  | 0.1681                                  |

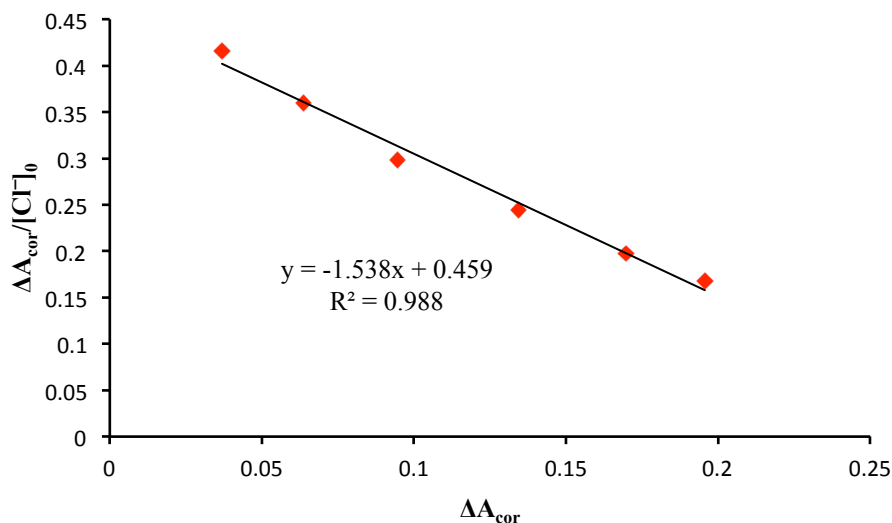

**Figure S16.** Linear least squares fitting of the titration data in Table S14.

**Binding of 1-bis with  $\text{H}_2\text{PO}_4^-$  in 25% (v/v) aqueous DMSO.** A 22.5  $\mu\text{M}$  solution of **1-bis** in 25%  $\text{H}_2\text{O}$ –DMSO (2.00 mL) was titrated with a 0.377 M solution of tetrabutylammonium dihydrogen phosphate in 25%  $\text{H}_2\text{O}$ –DMSO at 24 °C (Table S15). Non-linear curve fitting of the titration data affords  $K = 28 \text{ M}^{-1}$  and  $A_{\text{max}} = 0.169$  (Figure S17, 13-58% bound (i.e.,  $\Delta A/\Delta A_{\text{max}}$ )).

**Table S15.** Data for the titration of **1-bis** with  $\text{H}_2\text{PO}_4^-$  in 25%  $\text{H}_2\text{O}$ –DMSO at 389 nm.

| Entry | $\mu\text{L H}_2\text{PO}_4^-$<br>added | [thiourea] $_0$ ,<br>$\mu\text{M}$ | [ $\text{H}_2\text{PO}_4^-$ ] $_0$ ,<br>mM | Observed<br>absorption | Calculated<br>absorption <sup>a</sup> |
|-------|-----------------------------------------|------------------------------------|--------------------------------------------|------------------------|---------------------------------------|
| 0     |                                         | 22.5                               | 0                                          | 0.3151                 | 0.3151                                |
| 1     | 30                                      | 22.4                               | 5.56                                       | 0.3349                 | 0.3327                                |
| 2     | 45                                      | 22.4                               | 8.28                                       | 0.3400                 | 0.3391                                |
| 3     | 60                                      | 22.4                               | 11.0                                       | 0.3446                 | 0.3442                                |
| 4     | 80                                      | 22.2                               | 14.5                                       | 0.3493                 | 0.3496                                |
| 5     | 100                                     | 22.1                               | 17.9                                       | 0.3515                 | 0.3536                                |
| 6     | 150                                     | 22.0                               | 26.3                                       | 0.3582                 | 0.3594                                |
| 7     | 200                                     | 21.8                               | 34.2                                       | 0.3622                 | 0.3613                                |
| 8     | 300                                     | 21.6                               | 49.1                                       | 0.3594                 | 0.3588                                |

<sup>a</sup> From the non-linear curve fit.

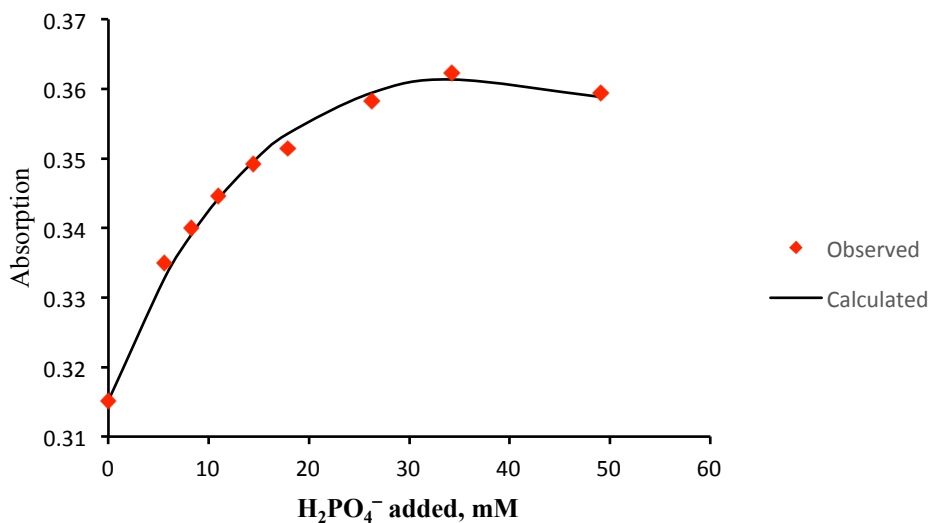

**Figure S17.** Non-linear least squares fitting of the titration data in Table S15.

**Binding of 1-mono with H<sub>2</sub>PO<sub>4</sub><sup>-</sup> in 25% (v/v) aqueous DMSO.** A 45 μM solution of **1-mono** in 25% H<sub>2</sub>O–DMSO (2.00 mL) was titrated with a 0.367 M solution of tetrabutylammonium dihydrogen phosphate in 25% H<sub>2</sub>O–DMSO at 23 °C (Table S16). A linear least squares fit in the single-reciprocal plot affords  $K = 12 \text{ M}^{-1}$  and  $\Delta A_{\text{max}} = 0.315$  (Figure S18, 4-54% bound (i.e.,  $\Delta A/\Delta A_{\text{max}}$ )).

**Table S16.** Data for the titration of **1-mono** with H<sub>2</sub>PO<sub>4</sub><sup>-</sup> in 25% H<sub>2</sub>O–DMSO at 388 nm.

| Entry | μL H <sub>2</sub> PO <sub>4</sub> <sup>-</sup> added | [H <sub>2</sub> PO <sub>4</sub> <sup>-</sup> ] <sub>0</sub> , M | Observed absorption | ΔA <sub>cor</sub> | ΔA <sub>cor</sub> / [H <sub>2</sub> PO <sub>4</sub> <sup>-</sup> ] <sub>0</sub> |
|-------|------------------------------------------------------|-----------------------------------------------------------------|---------------------|-------------------|---------------------------------------------------------------------------------|
| 0     | 0                                                    | 0                                                               | 0.3935              | –                 | –                                                                               |
| 1     | 30                                                   | 0.00542                                                         | 0.4069              | 0.0194            | 3.582                                                                           |
| 2     | 60                                                   | 0.01067                                                         | 0.4173              | 0.0363            | 3.401                                                                           |
| 3     | 90                                                   | 0.01578                                                         | 0.4212              | 0.0465            | 2.949                                                                           |
| 4     | 140                                                  | 0.02398                                                         | 0.4307              | 0.0672            | 2.804                                                                           |
| 5     | 200                                                  | 0.03332                                                         | 0.4369              | 0.0870            | 2.612                                                                           |
| 6     | 300                                                  | 0.04781                                                         | 0.4393              | 0.1116            | 2.334                                                                           |
| 7     | 400                                                  | 0.06109                                                         | 0.4360              | 0.1295            | 2.119                                                                           |
| 8     | 500                                                  | 0.07331                                                         | 0.4315              | 0.1457            | 1.988                                                                           |
| 9     | 700                                                  | 0.09504                                                         | 0.4180              | 0.1706            | 1.795                                                                           |

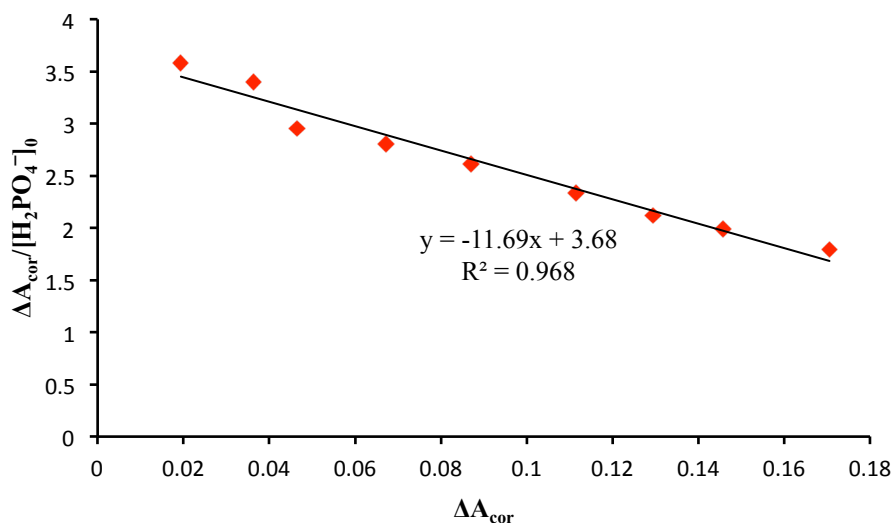

**Figure S18.** Linear least squares fitting of the titration data in Table S16.

**Binding of 1-mono with  $OAc^-$  in 25% (v/v) aqueous DMSO.** A 60  $\mu\text{M}$  solution of **1-mono** in 25%  $H_2O$ -DMSO (1.00 mL) was titrated with a 0.367 M solution of tetrabutylammonium acetate in 25%  $H_2O$ -DMSO at 23  $^\circ\text{C}$  (Table S17). A linear least squares fit in the single-reciprocal plot affords  $K = 12 \text{ M}^{-1}$  and  $\Delta A_{\text{max}} = 0.436$  (Figure S19, 9-68% bound (i.e.,  $\Delta A/\Delta A_{\text{max}}$ )).

**Table S17.** Data for the titration of **1-mono** with  $OAc^-$  in 25%  $H_2O$ -DMSO at 387 nm.

| Entry | $\mu\text{L } OAc^-$ added | $[OAc^-]_0, \text{M}$ | Observed absorption | $\Delta A_{\text{cor}}$ | $\Delta A_{\text{cor}}/[OAc^-]_0$ |
|-------|----------------------------|-----------------------|---------------------|-------------------------|-----------------------------------|
| 0     | 0                          | 0                     | 0.5513              | –                       | –                                 |
| 1     | 15                         | 0.00777               | 0.5829              | 0.0403                  | 5.182                             |
| 2     | 30                         | 0.01532               | 0.6014              | 0.0681                  | 4.443                             |
| 3     | 50                         | 0.02505               | 0.6207              | 0.1003                  | 4.005                             |
| 4     | 75                         | 0.03670               | 0.6387              | 0.1352                  | 3.684                             |
| 5     | 100                        | 0.04782               | 0.6454              | 0.1585                  | 3.315                             |
| 6     | 125                        | 0.05845               | 0.6499              | 0.1796                  | 3.073                             |
| 7     | 150                        | 0.06862               | 0.6597              | 0.2072                  | 3.019                             |
| 8     | 200                        | 0.08769               | 0.6472              | 0.2250                  | 2.566                             |
| 9     | 250                        | 0.1052                | 0.6357              | 0.2429                  | 2.309                             |
| 10    | 300                        | 0.1214                | 0.6211              | 0.2558                  | 2.106                             |
| 11    | 400                        | 0.1504                | 0.6010              | 0.2897                  | 1.927                             |
| 12    | 450                        | 0.1633                | 0.5856              | 0.2973                  | 1.820                             |



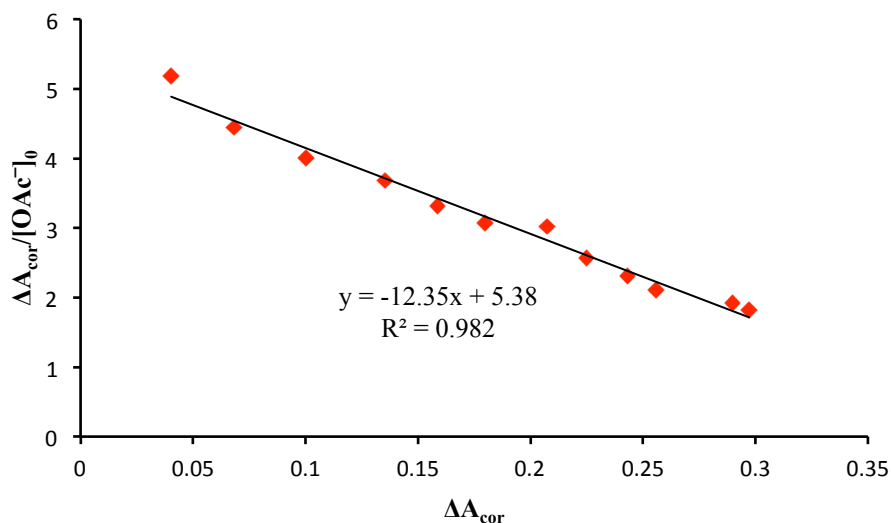

**Figure S19.** Linear least squares fitting of the titration data in Table S17.

**Binding of 1-tris with  $H_2PO_4^-$  in 30% (v/v) aqueous DMSO.** A 15  $\mu\text{M}$  solution of **1-tris** in 30%  $H_2O$ -DMSO (2.00 mL) was titrated with a 51.8 mM solution of tetrabutylammonium dihydrogen phosphate in 30%  $H_2O$ -DMSO at 23  $^\circ\text{C}$  (Table S18). Non-linear curve fitting of the titration data affords  $K = 1400 \text{ M}^{-1}$  and  $A_{\text{max}} = 0.462$  (Figure S20).

**Binding of 1-tris with  $OAc^-$  in 30% (v/v) aqueous DMSO.** A 15  $\mu\text{M}$  solution of **1-tris** in 30%  $H_2O$ -DMSO (2.00 mL) was titrated with a 0.462 M solution of tetrabutylammonium acetate in 30%  $H_2O$ -DMSO containing 15  $\mu\text{M}$  of **1-tris** at 23  $^\circ\text{C}$  (Table S19). Non-linear curve fitting of the titration data with a fixed  $\Delta A_{\text{max}} = 0.120$  (i.e., as for the 25%  $H_2O$ -DMSO) affords  $K = 13 \text{ M}^{-1}$  (entries 1-7, 1-40% bound (i.e.,  $\Delta A/\Delta A_{\text{max}}$ ); deviation was observed thereafter presumably due to sequential 1:2 binding, Figure S21).

**Table S18.** Data for the titration of **1-tris** with  $\text{H}_2\text{PO}_4^-$  in 30%  $\text{H}_2\text{O}$ –DMSO at 395 nm.

| Entry | $\mu\text{L H}_2\text{PO}_4^-$<br>added | [thiourea] <sub>0</sub> ,<br>$\mu\text{M}$ | [ $\text{H}_2\text{PO}_4^-$ ] <sub>0</sub> ,<br>$\mu\text{M}$ | Observed<br>absorption | Calculated<br>absorption <sup>a</sup> |
|-------|-----------------------------------------|--------------------------------------------|---------------------------------------------------------------|------------------------|---------------------------------------|
| 0     | 0                                       | 15.00                                      | 0                                                             | 0.2271                 | 0.2271                                |
| 1     | 2                                       | 14.99                                      | 52                                                            | 0.2494                 | 0.2425                                |
| 2     | 4                                       | 14.97                                      | 103                                                           | 0.2616                 | 0.2559                                |
| 3     | 6                                       | 14.96                                      | 155                                                           | 0.2710                 | 0.2678                                |
| 4     | 9                                       | 14.93                                      | 232                                                           | 0.2865                 | 0.2830                                |
| 5     | 12                                      | 14.91                                      | 308                                                           | 0.2980                 | 0.2958                                |
| 6     | 16                                      | 14.88                                      | 411                                                           | 0.3088                 | 0.3101                                |
| 7     | 22                                      | 14.84                                      | 563                                                           | 0.3249                 | 0.3269                                |
| 8     | 30                                      | 14.78                                      | 764                                                           | 0.3388                 | 0.3434                                |
| 9     | 40                                      | 14.71                                      | 1014                                                          | 0.3548                 | 0.3579                                |
| 10    | 50                                      | 14.63                                      | 1262                                                          | 0.3658                 | 0.3681                                |
| 11    | 70                                      | 14.49                                      | 1749                                                          | 0.3798                 | 0.3809                                |
| 12    | 90                                      | 14.35                                      | 2227                                                          | 0.3877                 | 0.3879                                |
| 13    | 115                                     | 14.19                                      | 2813                                                          | 0.3942                 | 0.3923                                |
| 14    | 140                                     | 14.02                                      | 3384                                                          | 0.3978                 | 0.3940                                |

<sup>a</sup> From the non-linear curve fit.

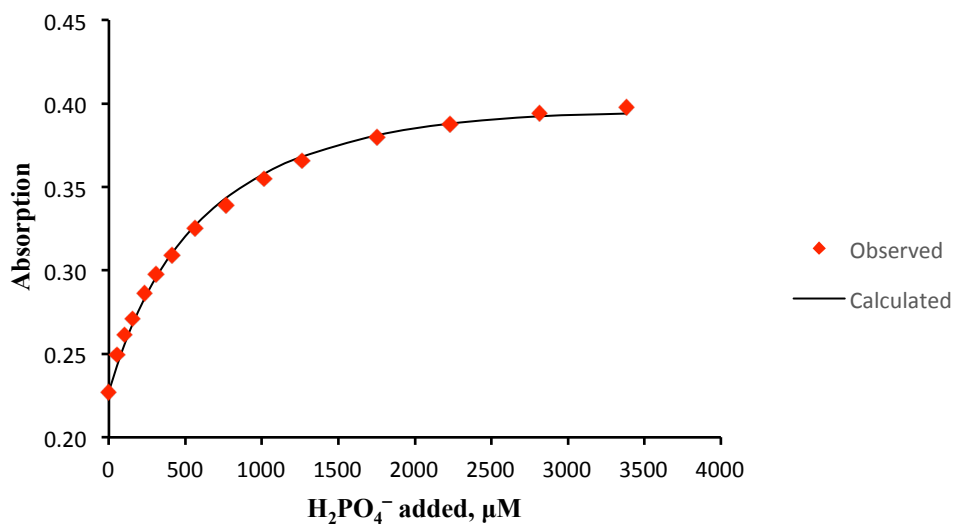

**Figure S20.** Non-linear least squares fitting of the titration data in Table S18.

**Table S19.** Data for the titration of **1-tris** with  $\text{OAc}^-$  in 30%  $\text{H}_2\text{O}$ –DMSO at 379 nm.

| Entry | $\mu\text{L OAc}^-$<br>added | $[\text{thiourea}]_0,$<br>mM | $[\text{OAc}^-]_0,$<br>mM | Observed<br>absorption | Calculated<br>absorption <sup>a</sup> |
|-------|------------------------------|------------------------------|---------------------------|------------------------|---------------------------------------|
| 0     | 0                            | 0.015                        | 0.00                      | 0.3736                 | 0.3736                                |
| 1     | 5                            | 0.015                        | 1.15                      | 0.3742                 | 0.3754                                |
| 2     | 10                           | 0.015                        | 2.30                      | 0.3749                 | 0.3771                                |
| 3     | 50                           | 0.015                        | 11.25                     | 0.3868                 | 0.3890                                |
| 4     | 100                          | 0.015                        | 21.97                     | 0.3975                 | 0.4004                                |
| 5     | 150                          | 0.015                        | 32.19                     | 0.4088                 | 0.4091                                |
| 6     | 200                          | 0.015                        | 41.94                     | 0.4167                 | 0.4161                                |
| 7     | 250                          | 0.015                        | 51.26                     | 0.4249                 | 0.4218                                |
| 8     | 300                          | 0.015                        | 60.18                     | 0.4372                 | 0.4265                                |
| 9     | 400                          | 0.015                        | 76.90                     | 0.4532                 | 0.4338                                |
| 10    | 500                          | 0.015                        | 92.29                     | 0.4678                 | 0.4393                                |
| 11    | 600                          | 0.015                        | 106.49                    | 0.4751                 | 0.4435                                |
| 12    | 775                          | 0.015                        | 128.89                    | 0.4904                 | 0.4490                                |

<sup>a</sup> From the non-linear curve fit.

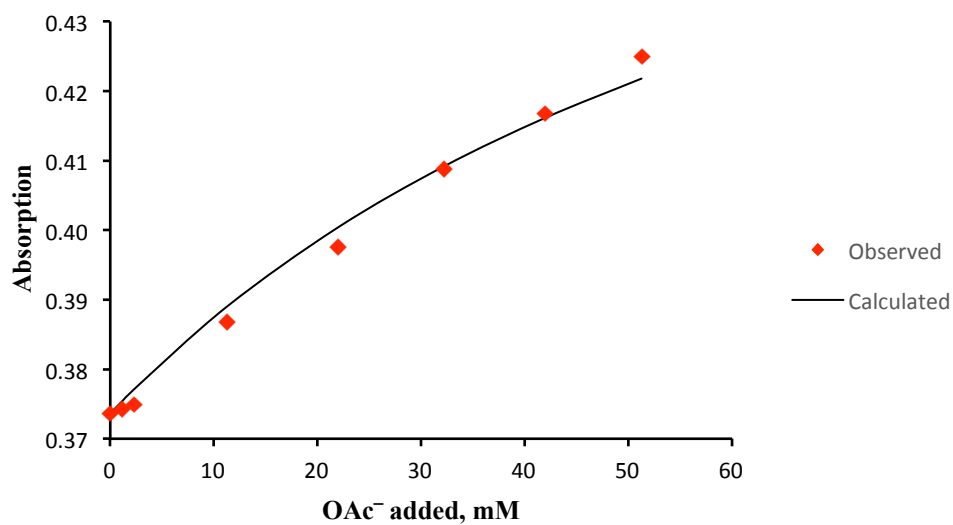

**Figure S21.** Non-linear least squares fitting of the titration data in Table S19.

**Table S20.**  $^{31}\text{P}$  NMR chemical shifts of phosphorous compounds in presence and absence of **4-tris**.<sup>a</sup>

| Entry | Phosphate compound                                                   | $\delta$ , ppm |
|-------|----------------------------------------------------------------------|----------------|
| 1     | $\text{Bu}_4\text{N}^+\text{H}_2\text{PO}_4^- \cdot \mathbf{4-tris}$ | 0.5 ppm        |
| 2     | $\text{Bu}_4\text{N}^+\text{H}_2\text{PO}_4^-$                       | 2.2 ppm        |
| 3     | $(\text{Bu}_4\text{N}^+)_2\text{HPO}_4^{2-}$                         | 3.2 ppm        |
| 4     | Extraction simulation <sup>b</sup>                                   | 4.1 ppm        |
| 5     | $(\text{Bu}_4\text{N}^+)_2\text{HPO}_4^{2-} \cdot \mathbf{4-tris}$   | 4.5 ppm        |

<sup>a</sup> Spectra taken of 10 mM solutions in  $\text{CDCl}_3$ . Dibasic phosphate was prepared by adding 1 equivalent of a 1.07 M  $\text{Bu}_4\text{N}^+\text{OH}^-$  solution in methanol. <sup>b</sup> Employed conditions: 10 mM **4-tris** and 5.9 mM  $(\text{Bu}_4\text{N}^+)_2\text{HPO}_4^{2-}$  in  $\text{CDCl}_3$ .

Figure 22. NMR spectra of **5**, **1-tris**, **1-bis** and **4-tris**.

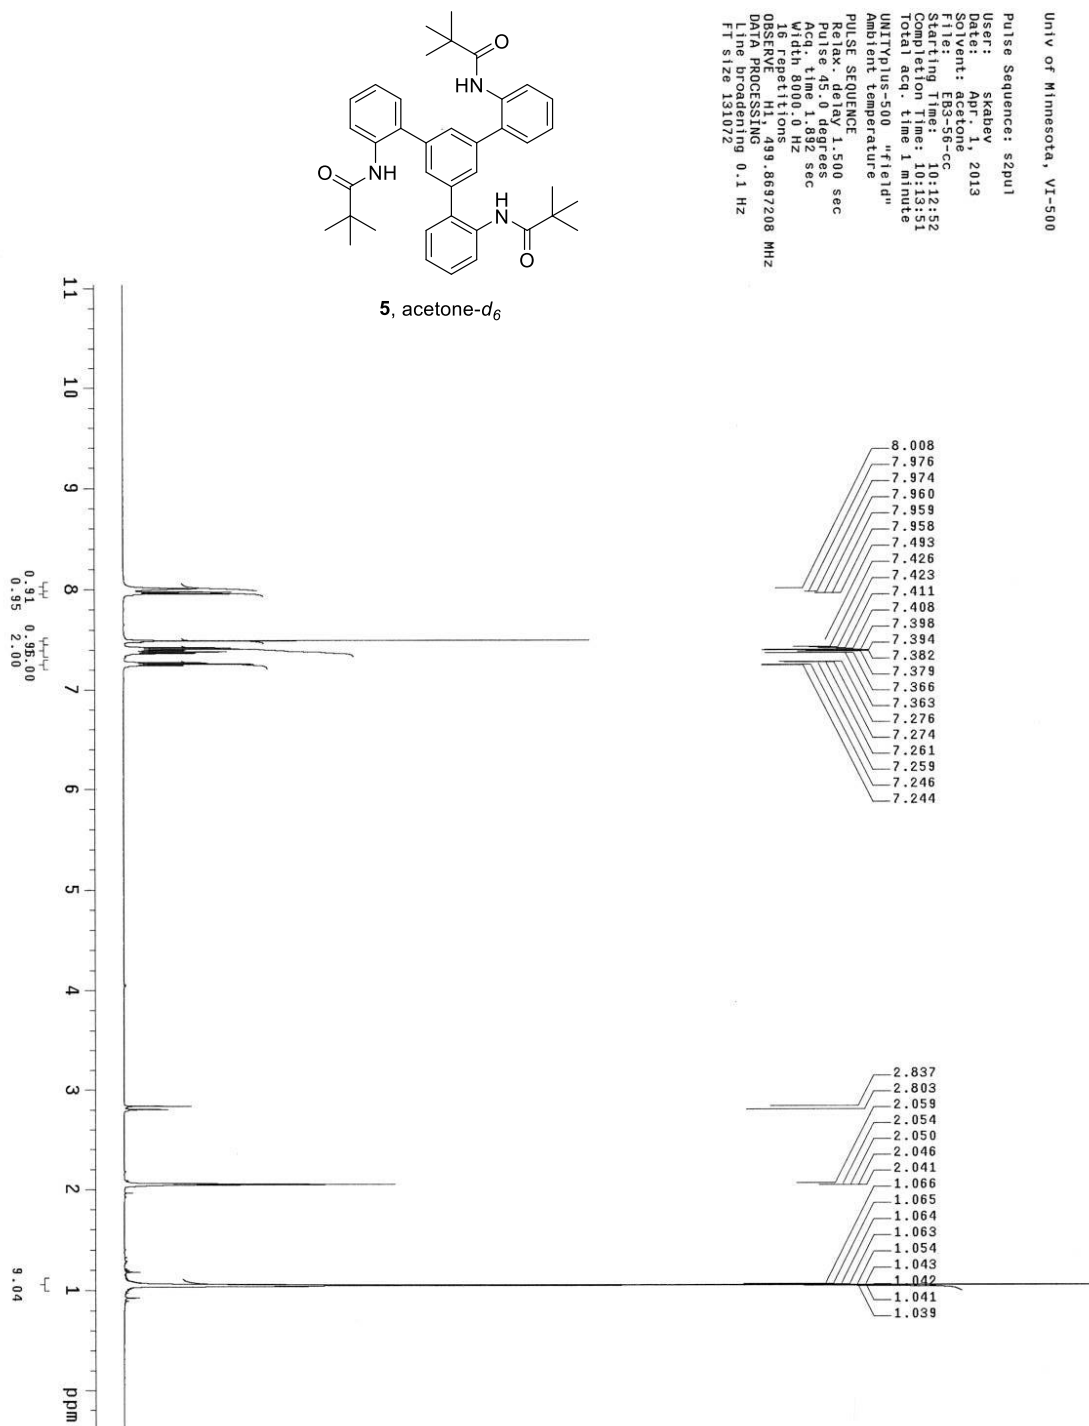

Univ of Minnesota, VI-500

Pulse Sequence: s2pul

User: skabej  
Date: April, 2013  
Sample: P101  
File: E83-56-cc  
Starting Time: 10:12:52  
Completion Time: 10:13:51  
Total acq. time 1 minute  
UNITYplus-500 "f1e1d"  
Ambient temperature  
PULSE SEQUENCE  
Relax. delay 1.500 sec  
Pulse 45.0 degrees  
Acq. time 1.892 sec  
Width 8000.0 Hz  
Offset 11.0 Hz  
OBSERVED F1 F2 9.8697208 MHz  
DATA PROCESSING  
Line broadening 0.1 Hz  
FT size 131072

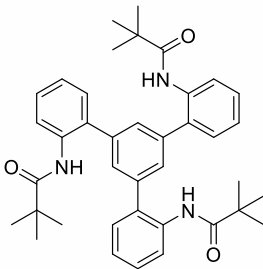

5, acetone-d<sub>6</sub>

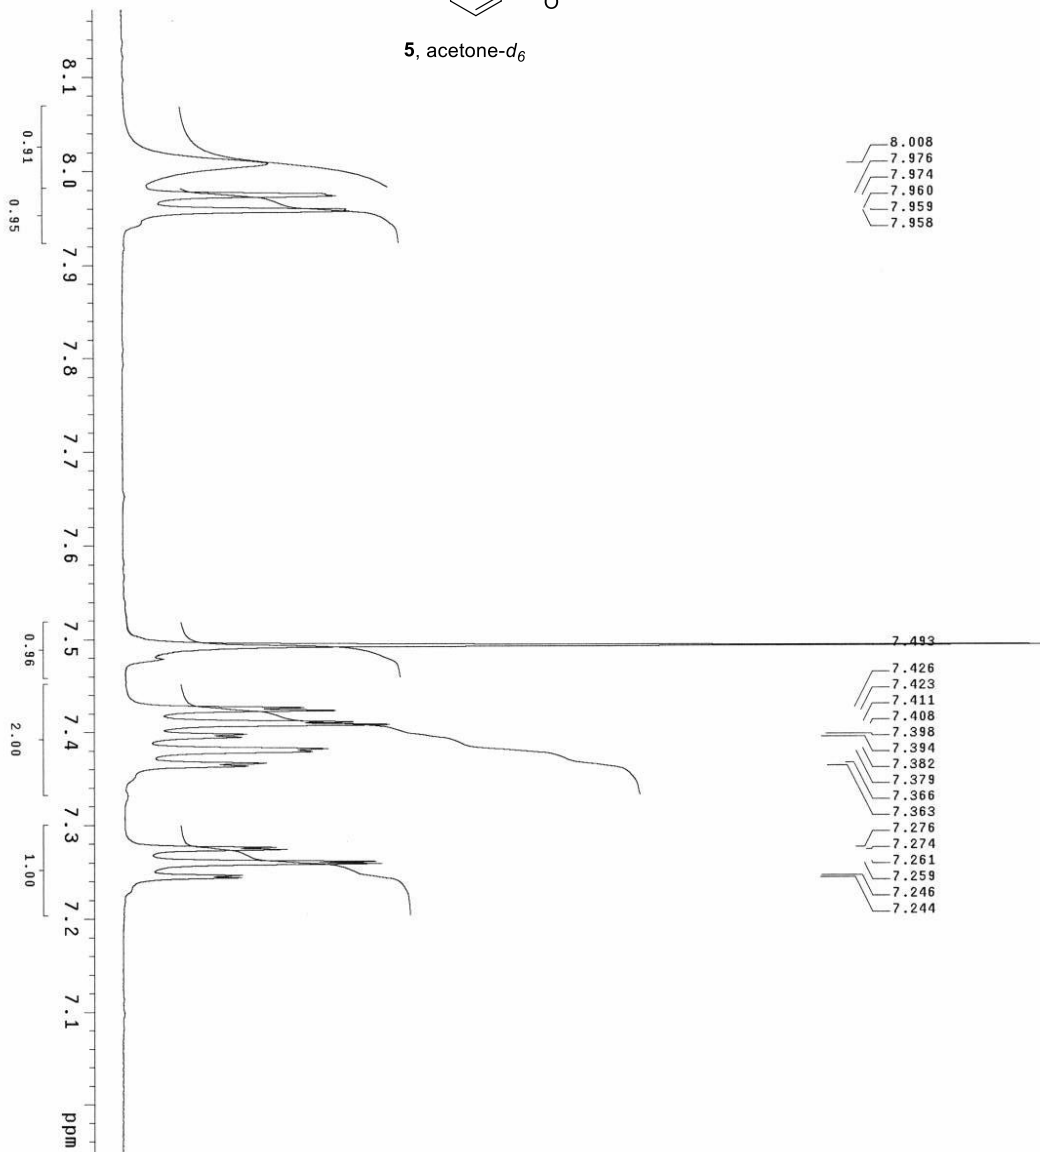

ER2-88  
 University of Minnesota  
 Department of Chemistry  
 VAC-300  
 Pulse Sequence: s2pu1  
 User: skabov  
 Date: May 30, 2012  
 Solvent: acetone  
 File: 120530V3\_1703  
 Starting Time: 15:30:37  
 Completion Time: 15:55:17  
 Total acq. time: 24 minutes  
 UNITYplus-500 "F1e1d"  
 Ambient temperature  
 PULSE SEQUENCE  
 Relax. delay 5.000 sec  
 Pulse 70.0 degrees  
 Acq. time 0.800 sec  
 V19 1.500 Hz  
 OBSERVE C13, 75.42362K3 MHz  
 DECOUPLE H1, 299.9564754 MHz  
 Power 40 db  
 on during acquisition  
 off during delay  
 on during acquisition  
 off during delay  
 on during acquisition  
 off during delay  
 Line broadening 1.5 Hz  
 FT size 65536

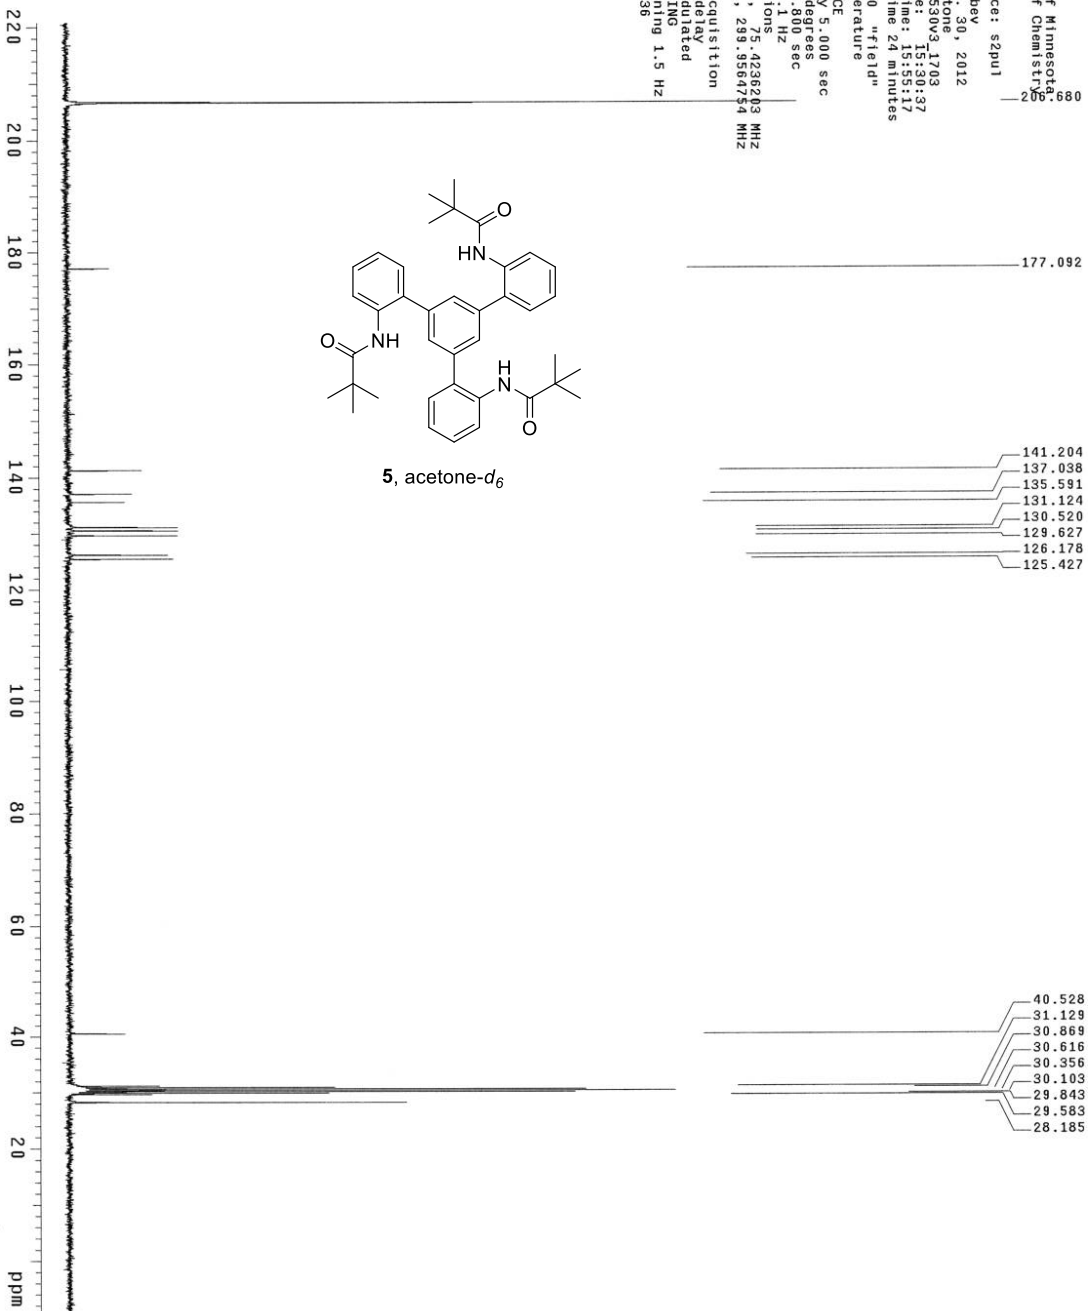

EB2-88  
University of Minnesota  
Department of Chemistry  
VAC-300

Pulse Sequence: szpul1  
User: skabov  
Date: May 30, 2012  
Solvent: acetone  
File: 120530V3\_1703  
Starting Time: 15:30:37  
Completion Time: 15:55:17  
Total acq. time 24 minutes  
UNITplus-500 "field"  
Ambient temperature  
PULSE SEQUENCE  
Relax. delay 5.000 sec  
Pulse 70.0 degrees  
Acq. time 0.800 sec  
Data points 1.12  
192 repetitions  
OBSERVE C13, 75.4236203 MHz  
DECOUPLE H1, 299.9564754 MHz  
Power 40 dB  
on during acquisition  
off during delay  
MALFROFSSM0  
Data processed  
Line broadening 1.5 Hz  
Ft size 65536

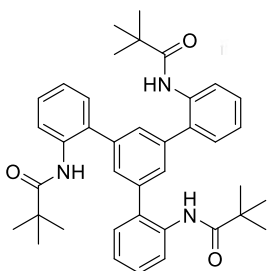

5, acetone-d<sub>6</sub>

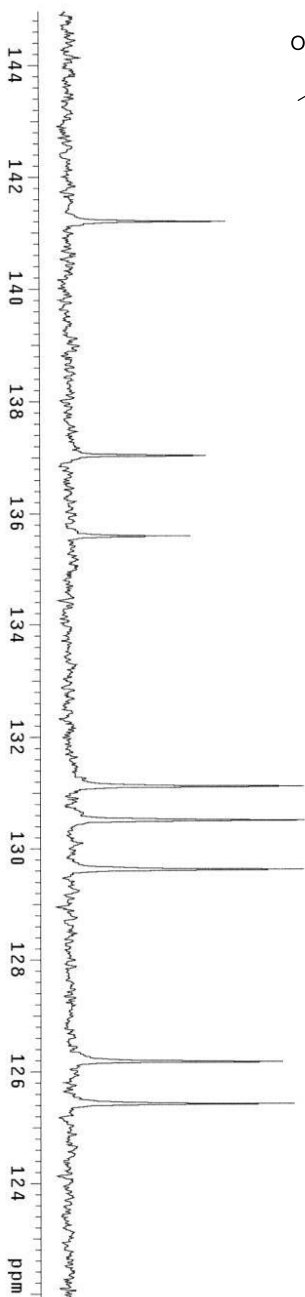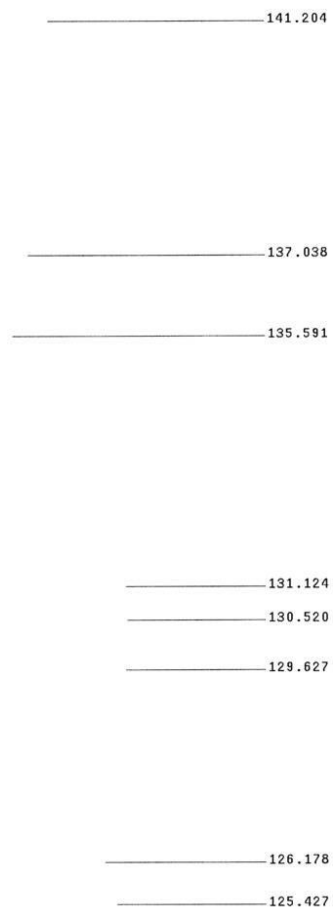



Univ of Minnesota, VI-500

Pulse Sequence: s2pu1  
User: skabav  
Date: Oct. 11, 2012  
Solvent: acetone  
Filter: EB2-187-cc2  
Starting time: 10:07:26  
Total acq. time: 1 minute  
UNITplus-500 "field"  
Ambient temperature  
PULSE SEQUENCE 1,500 sec  
Relax. delay 1,500 sec  
Pulse 450  
Acq. time 1.892 sec  
Width 8000.0 Hz  
4 repetitions  
OBSERVE H1, 499.8697206 MHz  
DATA PROCESSING  
Line broadening 0.1 Hz  
Line size 131072

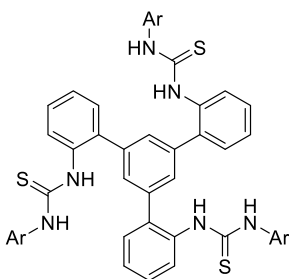

1-tris (Ar = *p*-C<sub>6</sub>H<sub>4</sub>NO<sub>2</sub>), acetone-*d*<sub>6</sub>

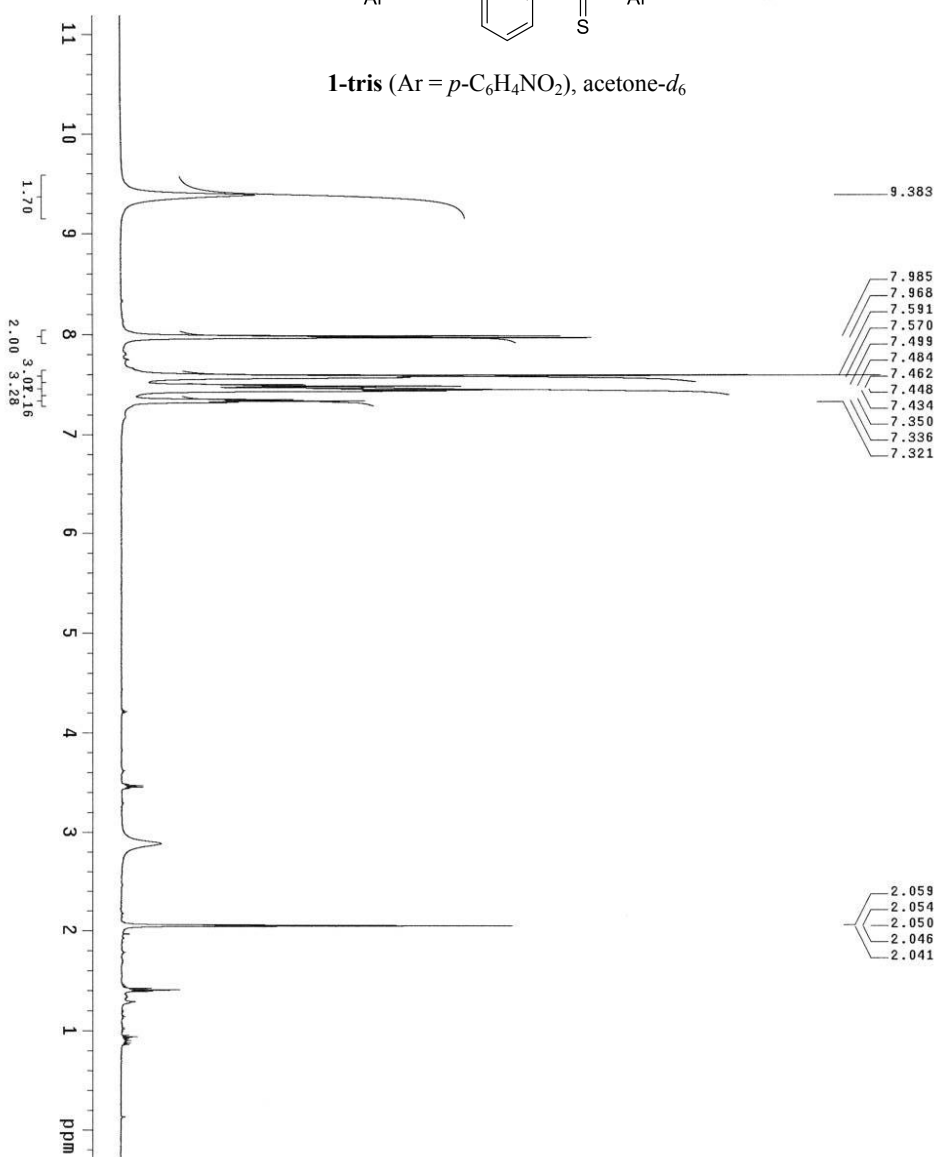

Univ of Minnesota, VI-500

Pulse Sequence: s2pul

User: skabev  
Date: Oct. 11, 2012  
Time: 10:07:49  
File: E82-483-CC2  
Starting Time: 10:07:26  
Completion Time: 10:07:49  
Total acq. time 1 minute  
UNITYplus-500 "field"  
Ambient temperature  
PULSE SEQUENCE  
Relax. delay 1.500 sec  
Pulse 45.0 degrees  
Acq. time 1.892 sec  
Width 8000.0 Hz  
4 repetitions 489.8697206 MHz  
DATA PROCESSING  
Line broadening 0.1 Hz  
FT size 131072

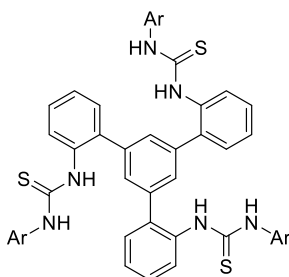

1-tris (Ar = *p*-C<sub>6</sub>H<sub>4</sub>NO<sub>2</sub>), acetone-*d*<sub>6</sub>

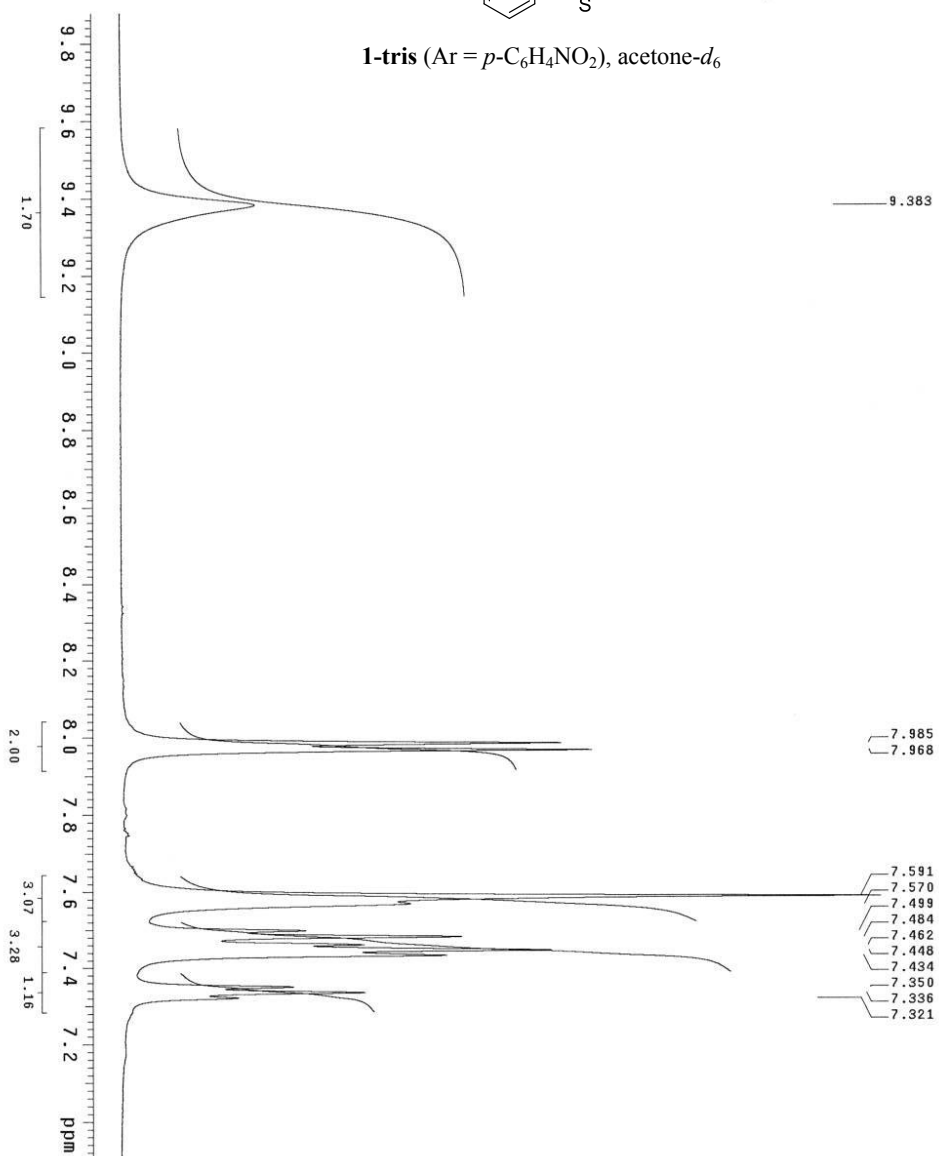

EB2-187  
University of Minnesota  
Department of Chemistry  
VAC-500

Pulse Sequence: szpu1  
User: skabey  
Date: Oct 11, 2012  
Solvent: acetone  
File: 121011v3\_7803  
Starting Time: 21:37:49  
Completion Time: 22:25:40  
Total acq. time 47 minutes

UNITplus-500 "field"  
Ambient temperature  
PULSE SEQUENCE  
Relax. delay 0.100 sec  
Pulse 70.0 degrees  
Pul. time 1.800 sec  
Wd. time 1.800 sec  
1024 Repetitions  
OBSERVE C13, 75.4236266 MHz  
DECUPLE H1, 299.9564754 MHz  
Power 40 db  
on during acquisition  
off during delay  
Waltz16 cancelled  
DATA PROCESSING  
Line broadening 1.5 Hz  
FT size 65536

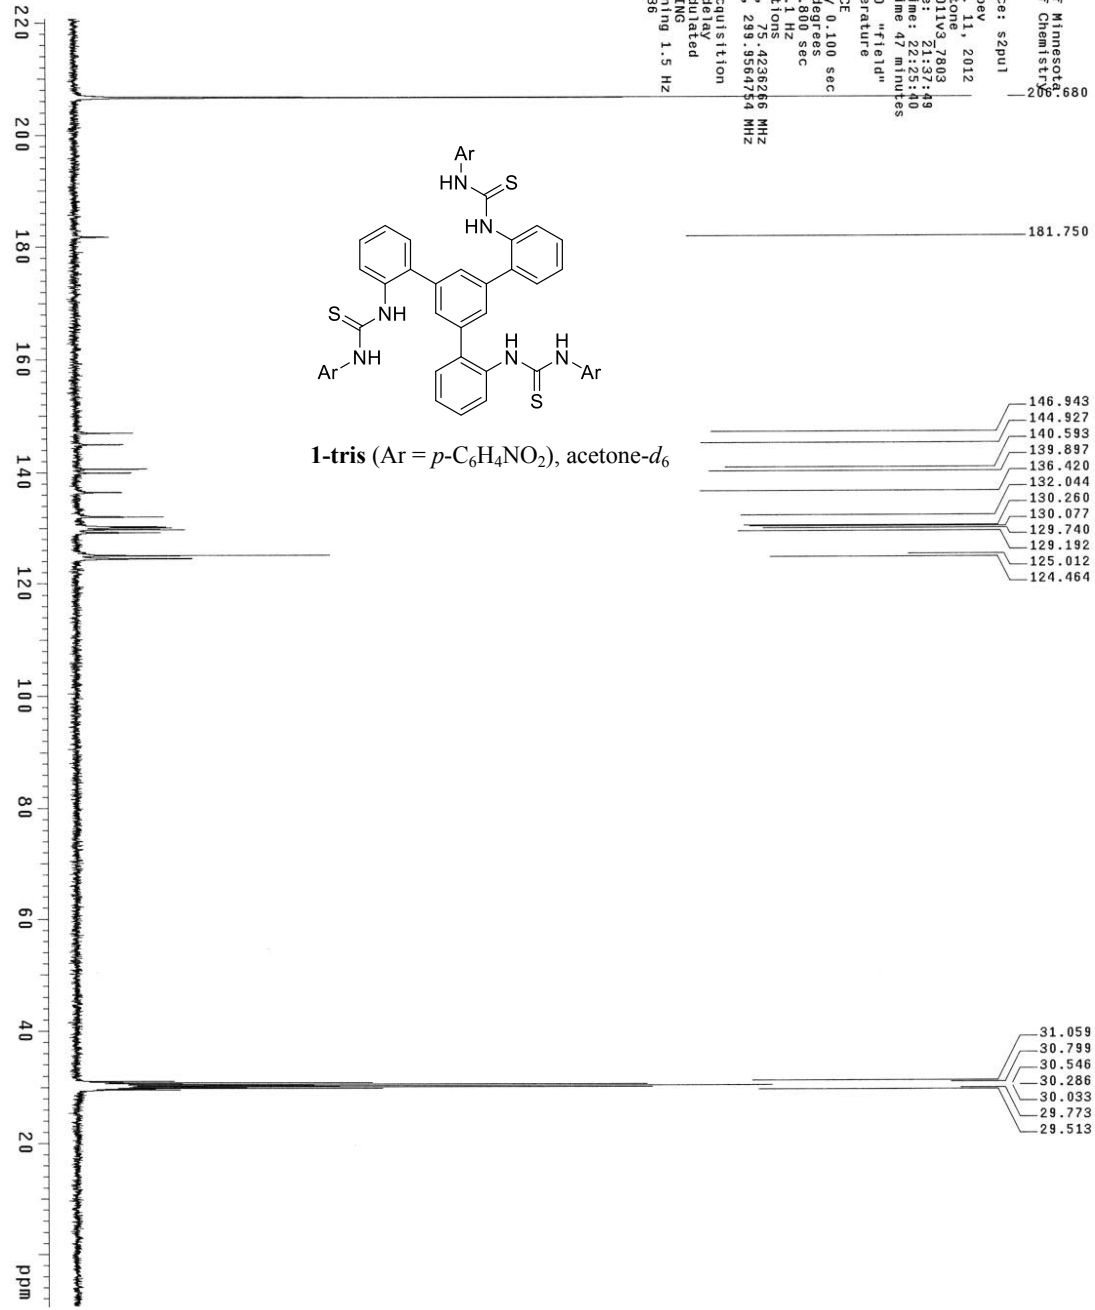

E82-187  
University of Minnesota  
Department of Chemistry  
VMC-500

Pulse Sequence: szpul  
User: skabov  
Date: Oct 11, 2012  
Solvent: acetone  
File: 12101V3\_7603  
Starting Time: 21:37:48  
Completion Time: 22:25:40  
Total acq. time 47 minutes  
UNITYplus-500 "field"  
Ambient temperature  
PULSE SEQUENCE  
Relax. delay 0.100 sec  
Pulse 70.0 degrees  
Acq. time 0.800 sec  
1024 -points  
OBSERVE C13, 75, 4236266 MHz  
DECOUPLE H1, 299.9564754 MHz  
Power 40 dB  
on during acquisition  
off during delay  
WALTZ16 deleted  
DUMPRF deleted  
Line broadening 1.5 Hz  
Ft size 65536

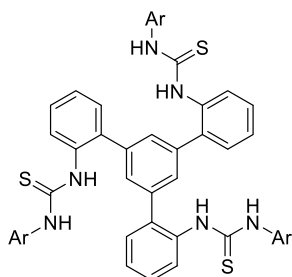

1-tris (Ar = *p*-C<sub>6</sub>H<sub>4</sub>NO<sub>2</sub>), acetone-*d*<sub>6</sub>

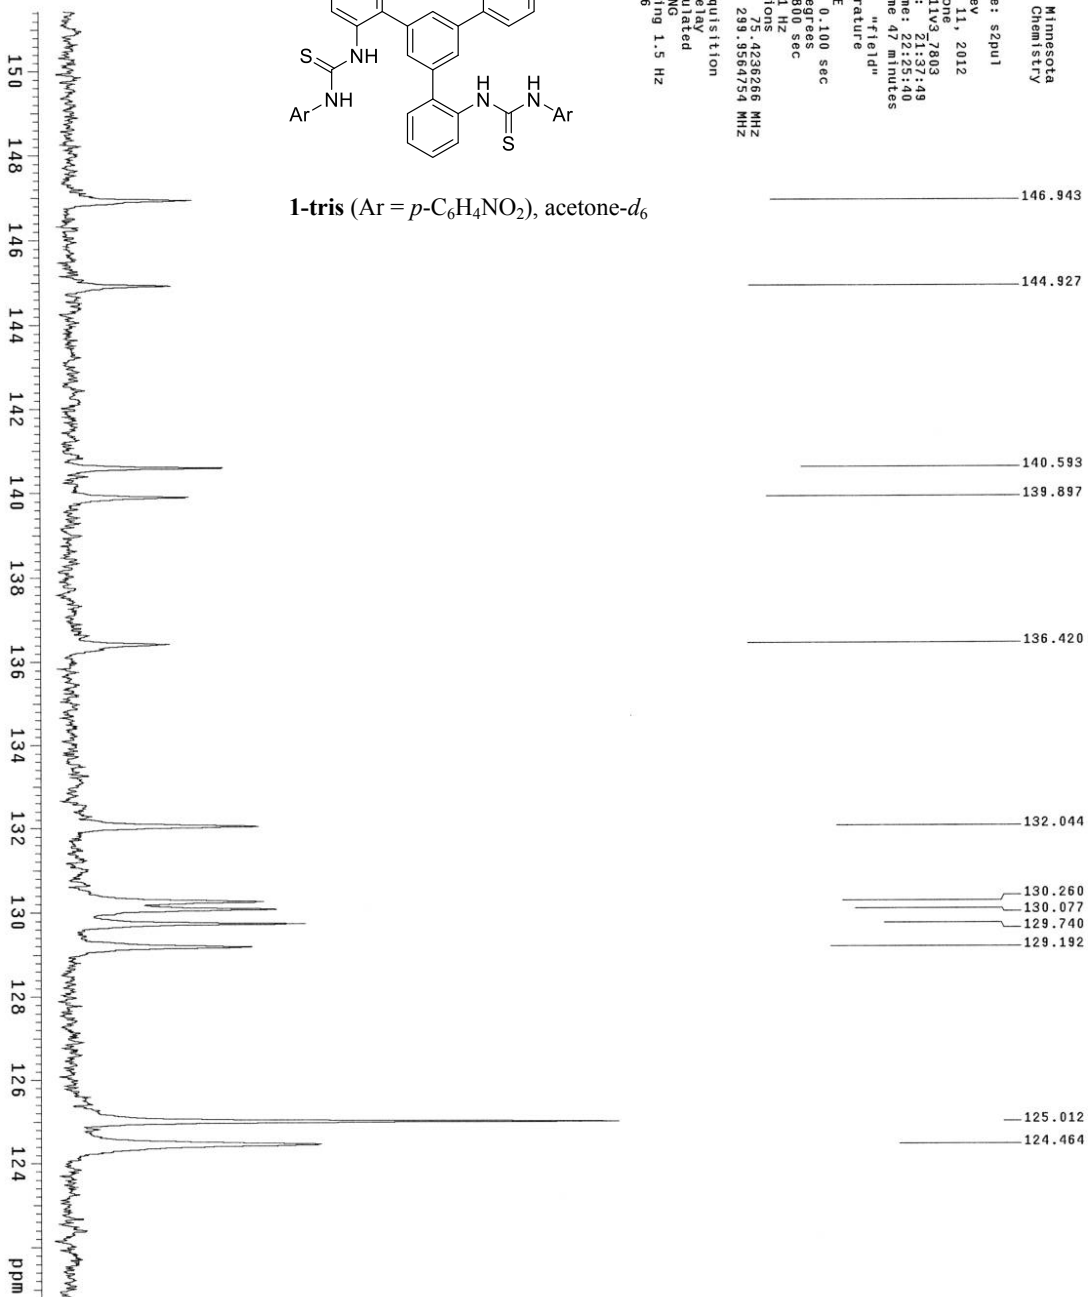

Univ. of Minnesota, VI-500

Pulse Sequence: szpu1

User: Skabey  
Date: Oct 24, 2012  
Site: 9C-24  
File: ER2-195-acetone  
Starting Time: 15:15:52  
Completion Time: 15:16:14  
Total acq. time 1 minute  
UNITVplus-500 "field"  
Ambient temperature  
PULSE SEQUENCE  
Relax. delay 1.500 sec  
Pulse 45.0 degrees  
Acq. time 1.892 sec  
Width 8000.0 Hz  
Observed F1 F2 99.8697206 MHz  
Reference F1 F2  
DATA PROCESSING  
Line broadening 0.1 Hz  
Ft size 131072

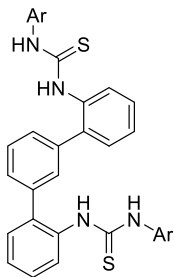

**1-bis** (Ar = *p*-C<sub>6</sub>H<sub>4</sub>NO<sub>2</sub>), acetone-*d*<sub>6</sub>

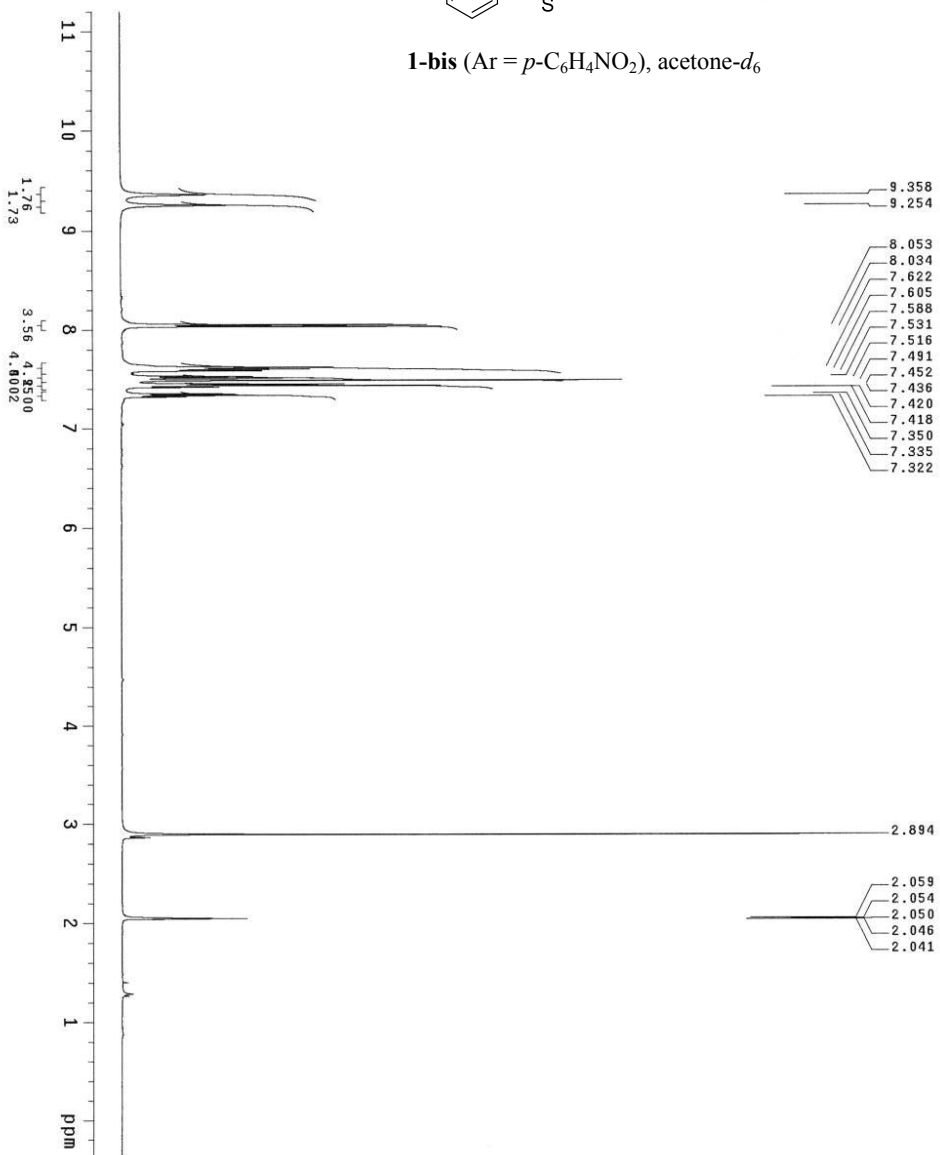

Univ of Minnesota, VI-500

Pulse Sequence: s2pul

User: skadev

Date: Oct. 24, 2012

Sample:

File: E82-195-acetone

Starting Time: 15:15:52

Completion Time: 15:16:14

Total acq. time 1 minute

UNITYplus-500 "field"

Ambient temperature

PULSE SEQUENCE

Relax. delay 1.500 sec

Pulse 45.0 degrees

Acq. time 1.892 sec

Width 8000.0 Hz

Number of Reptitions 489.8697206 MHz

DATA PROCESSING

Line broadening 0.1 Hz

FT size 131072

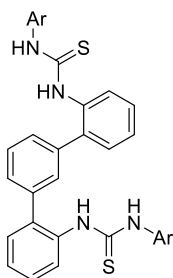

1-bis (Ar = *p*-C<sub>6</sub>H<sub>4</sub>NO<sub>2</sub>), acetone-*d*<sub>6</sub>

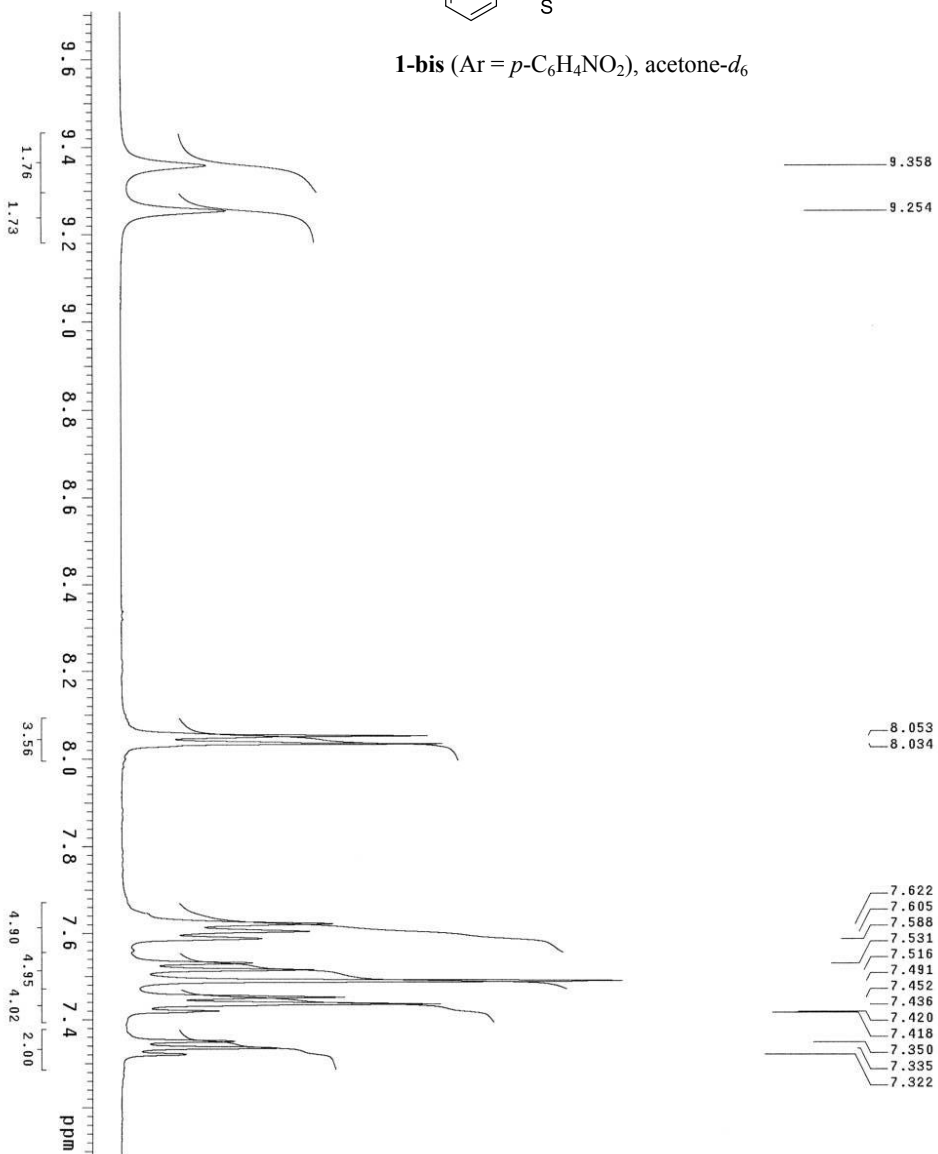

EB2-195  
University of Minnesota  
Department of Chemistry  
VAC-300

Pulse Sequence: szpu1

User: skabev  
Date: Oct. 23, 2012  
Solvent: acetone  
Filter: 121023V3\_6403  
Starting Time: 21:56:19  
Completion Time: 22:44:19  
Total acq. time: 47 minutes  
UNITYplus-500 "field"  
Ambient temperature  
PULSE SEQUENCE  
Relax. delay 0.100 sec  
Pulse 7.00 deg/sec  
Pulse 1.00 deg/sec  
Width 17361.1 Hz  
1024 repetitions  
OBSERVE C13, 75.4236288 MHz  
DECUPLE H1, 299.9564754 MHz  
Power 40 db  
or during acquisition  
VALT=16 updated  
DATA PROCESSING  
Line broadening 1.5 Hz  
FT size 65536

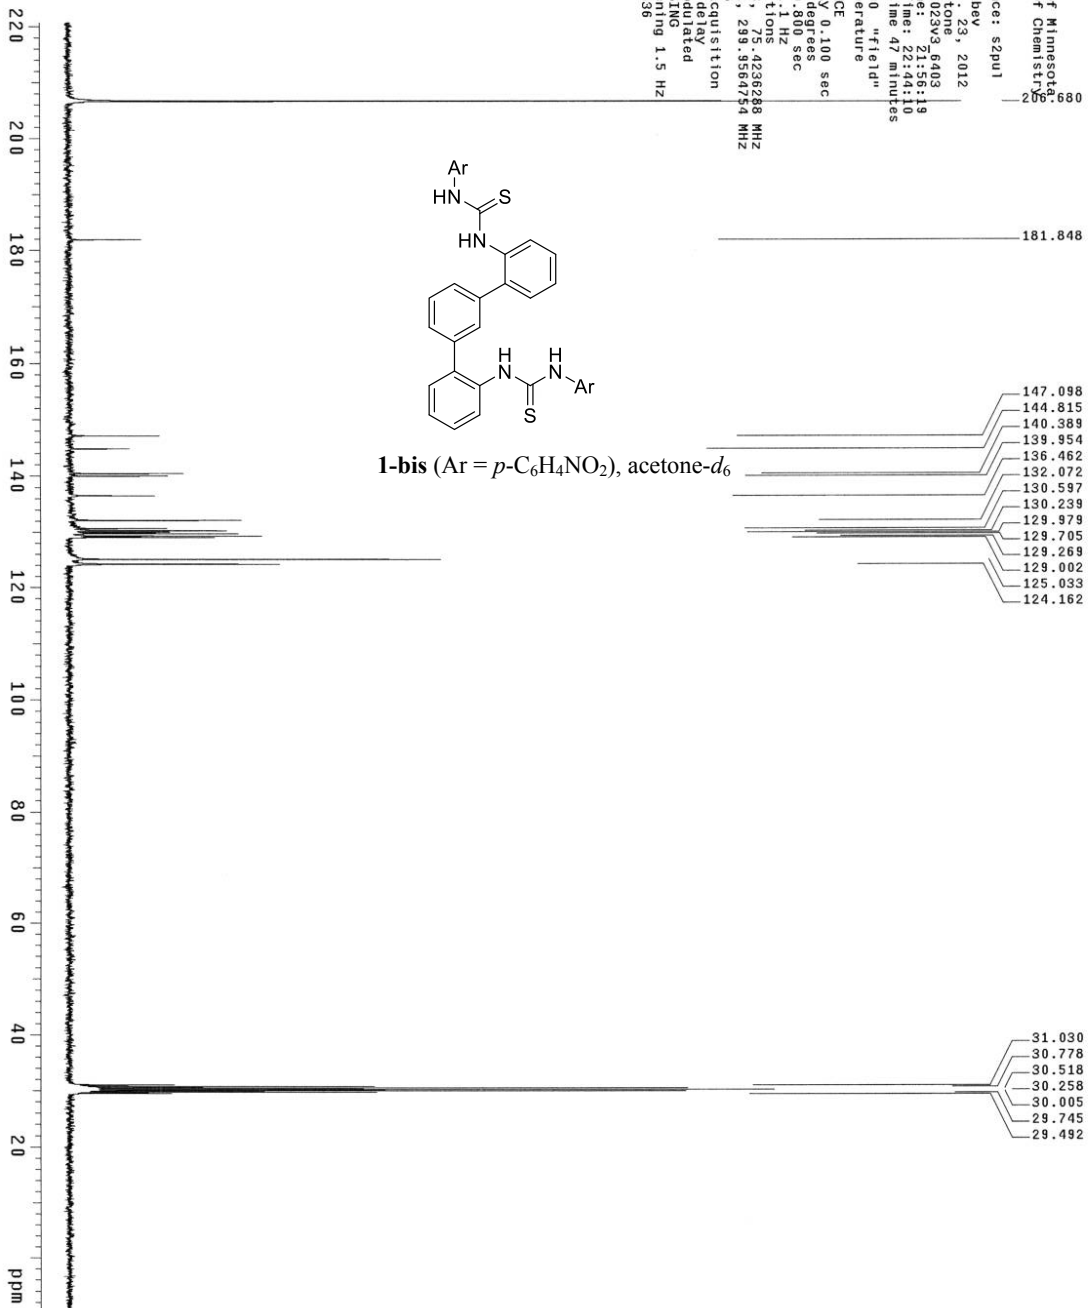

EB2-195  
University of Minnesota  
Department of Chemistry  
VAC-300

Pulse Sequence: szpui  
User: skabev  
Date: Oct. 23, 2012  
Solvent: acetone  
File: 121023V3\_6403  
Starting Time: 21:56:19  
Completion Time: 22:44:10  
Total acq. time 47 minutes  
UNITYplus-500 "field"  
Ambient temperature  
PULSE SEQUENCE  
Relax\_delay 0.100 sec  
Pulse\_prog 0 deg/sec  
Pulse\_width 12.00 sec  
Width 17361.9 Hz  
1024 repetitions  
OBSERVE C13, 75.4236288 MHz  
DECOUPLE H1, 299.9564754 MHz  
Power 40 db  
on during acquisition  
WALTZ-16 modulated  
DATA PROCESSING  
Line broadening 1.5 Hz  
FT size 65536

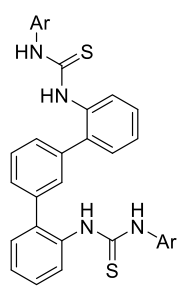

1-bis (Ar = *p*-C<sub>6</sub>H<sub>4</sub>NO<sub>2</sub>), acetone-*d*<sub>6</sub>

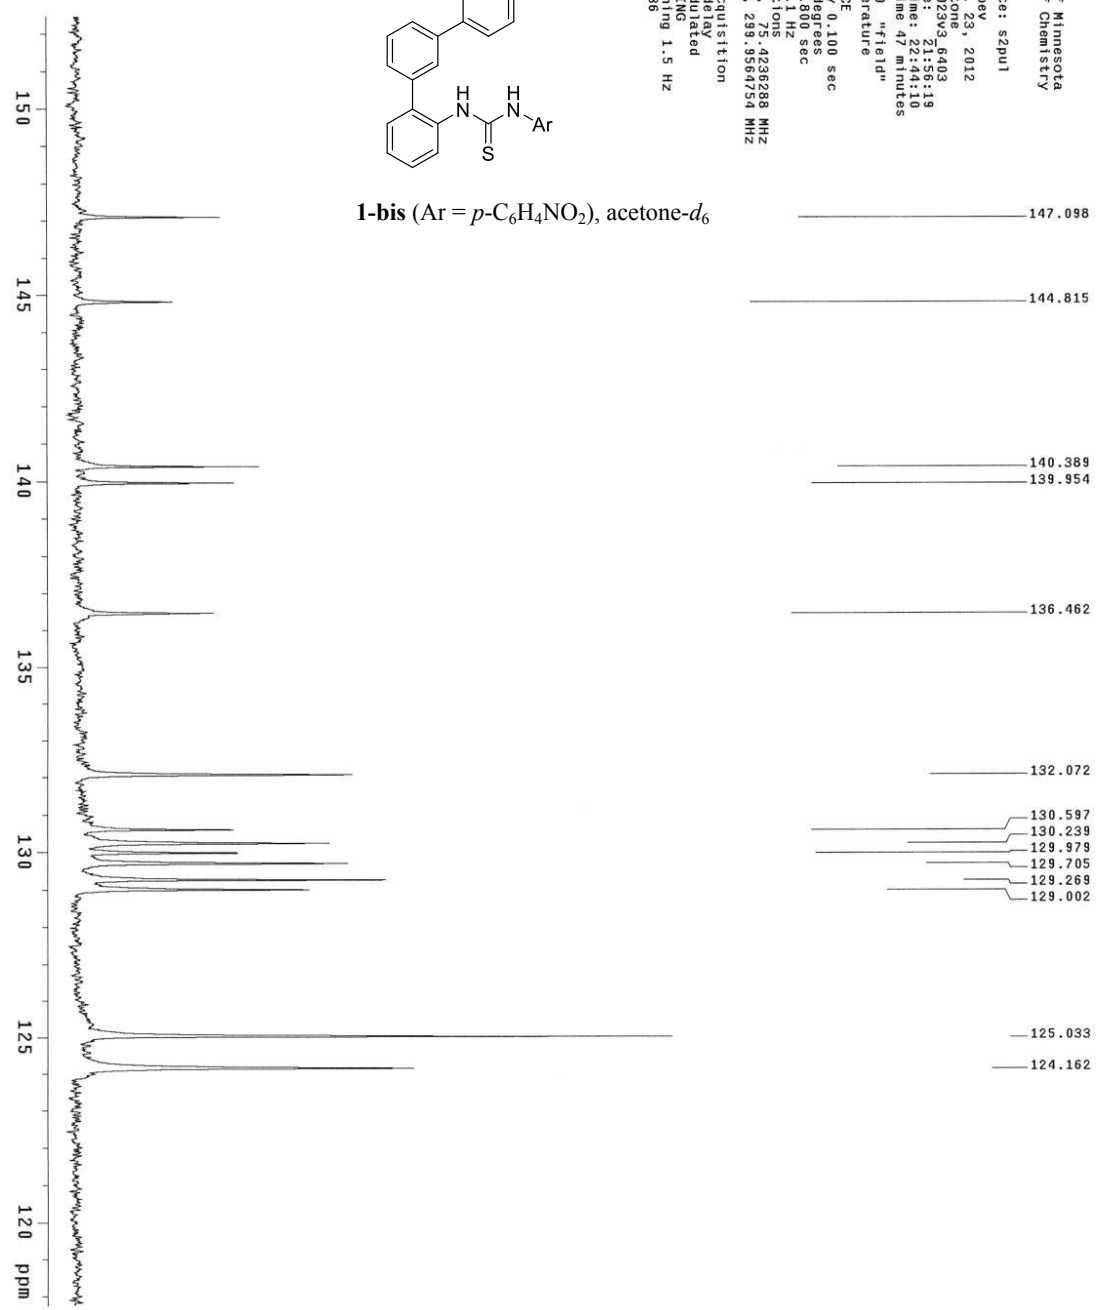



Univ of Minnesota, VI-500

Pulse Sequence: szpu1

User: Skabov

Date: Jun 5, 2012

Solvent: cdcl3

File: ER2-91-CC

Starting Time: 19:33:50

Completion Time: 19:34:12

Total acq. time 1 minute

UNITYplus-500 "field"

Ambient temperature

PULSE SEQUENCE

Relax. delay 1.500 sec

Pulse 45.0 degrees

Acq. time 1.992 sec

Relax. time 0.100 sec

4 repetitions

OBSERVE HI 439.8671250 MHz

DATA PROCESSING

Line broadening 0.1 Hz

FT size 131072

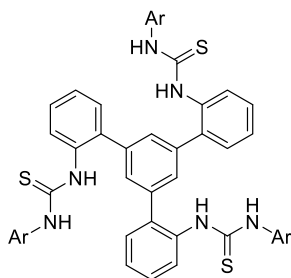

4-tris (Ar = 3,5-(CF<sub>3</sub>)<sub>2</sub>C<sub>6</sub>H<sub>3</sub>), CDCl<sub>3</sub>

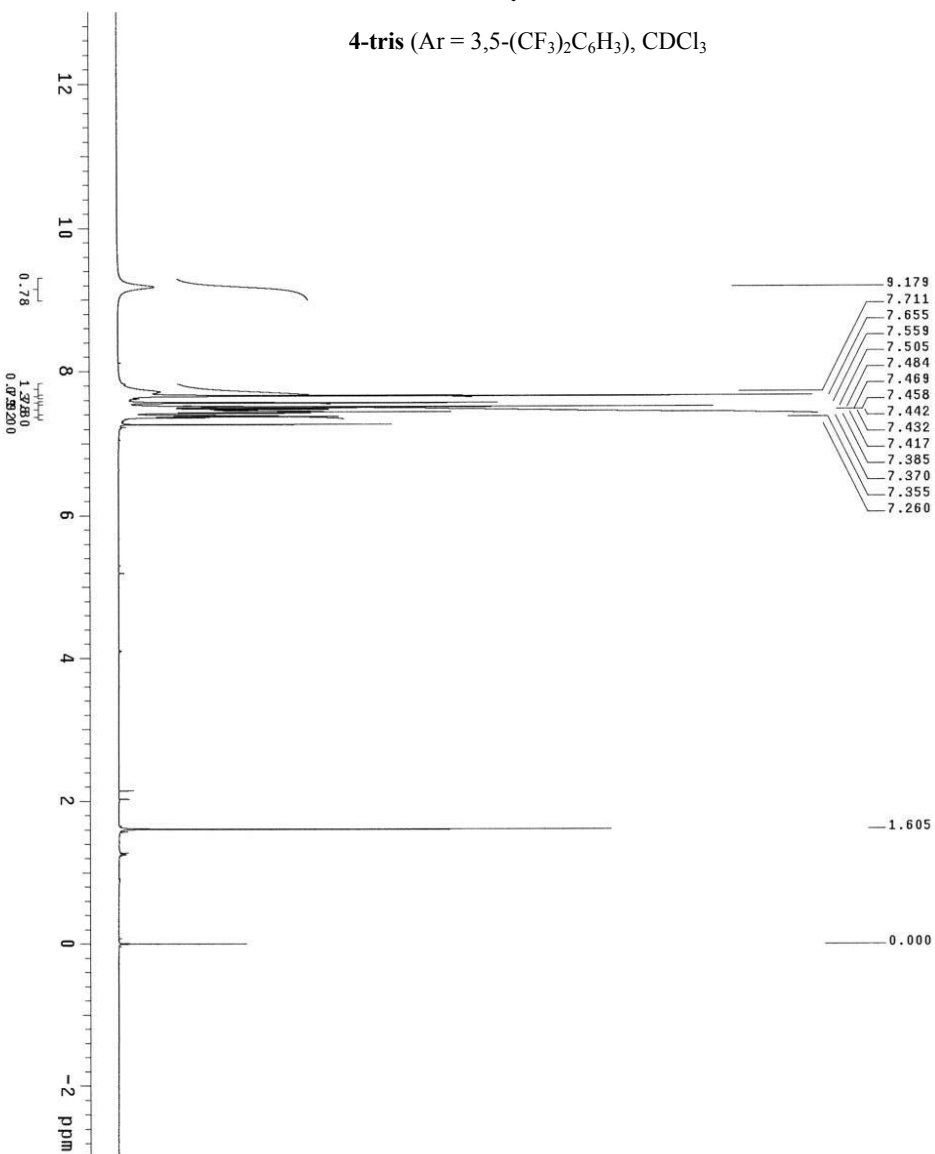

Univ of Minnesota, VI-500

Pulse Sequence: szpu1  
User: skabey  
Date: Jun 5, 2012  
Solvent: cdcl3  
File: E82-91-cc  
Starting Time: 19:33:50  
Completion Time: 19:34:12  
Total acq. time 1 minute  
UNITYplus-500 "field"  
Ambient temperature  
PULSE SEQUENCE  
Relax. delay 1.500 sec  
Pulse 45.0 degrees  
Acq. time 1.692 sec  
K1 1.000 Hz  
4 repetitions  
OBSERVE H1: 439.8671250 MHz  
DATA PROCESSING  
Line broadening 0.1 Hz  
FT size 131072

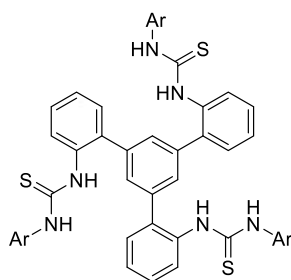

4-tris (Ar = 3,5-(CF<sub>3</sub>)<sub>2</sub>C<sub>6</sub>H<sub>3</sub>), CDCl<sub>3</sub>

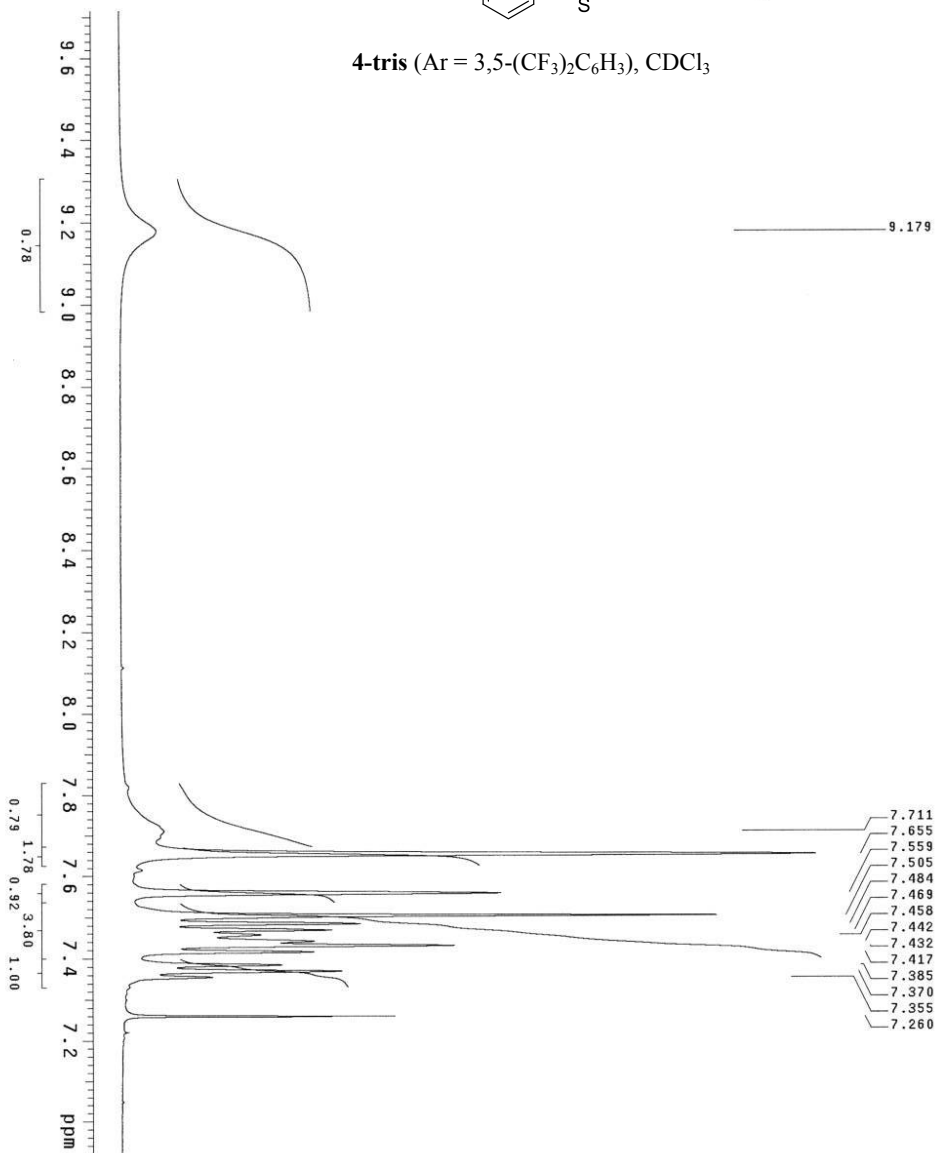

EB2-91  
University of Minnesota  
Department of Chemistry  
VAC-500

User: skabey  
Date: Jun 5, 2012  
Pulse Sequence: szpu1  
Solvent: CDCl3  
File: 120605V3\_4303  
Starting Time: 19:45:47  
Completion Time: 21:57:15  
Total acq. time 2.2 hours  
UNITYplus-500 "field"  
Ambient temperature  
PULSE SEQUENCE  
Relax. delay 5.000 sec  
Pulse 70.0 degrees  
Acq. time 0.900 sec  
V. time 0.900 sec  
1024 repetitions  
OBSERVE C13, 75.4233358 MHz  
DECOUPLE H1, 299.9549188 MHz  
Power 40 db  
on during acquisition  
off during delay  
Acquire data  
DATA PROCESSING  
Line broadening 1.5 Hz  
FT size 65536

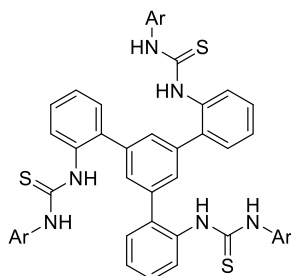

4-tris (Ar = 3,5-(CF<sub>3</sub>)<sub>2</sub>C<sub>6</sub>H<sub>3</sub>), CDCl<sub>3</sub>

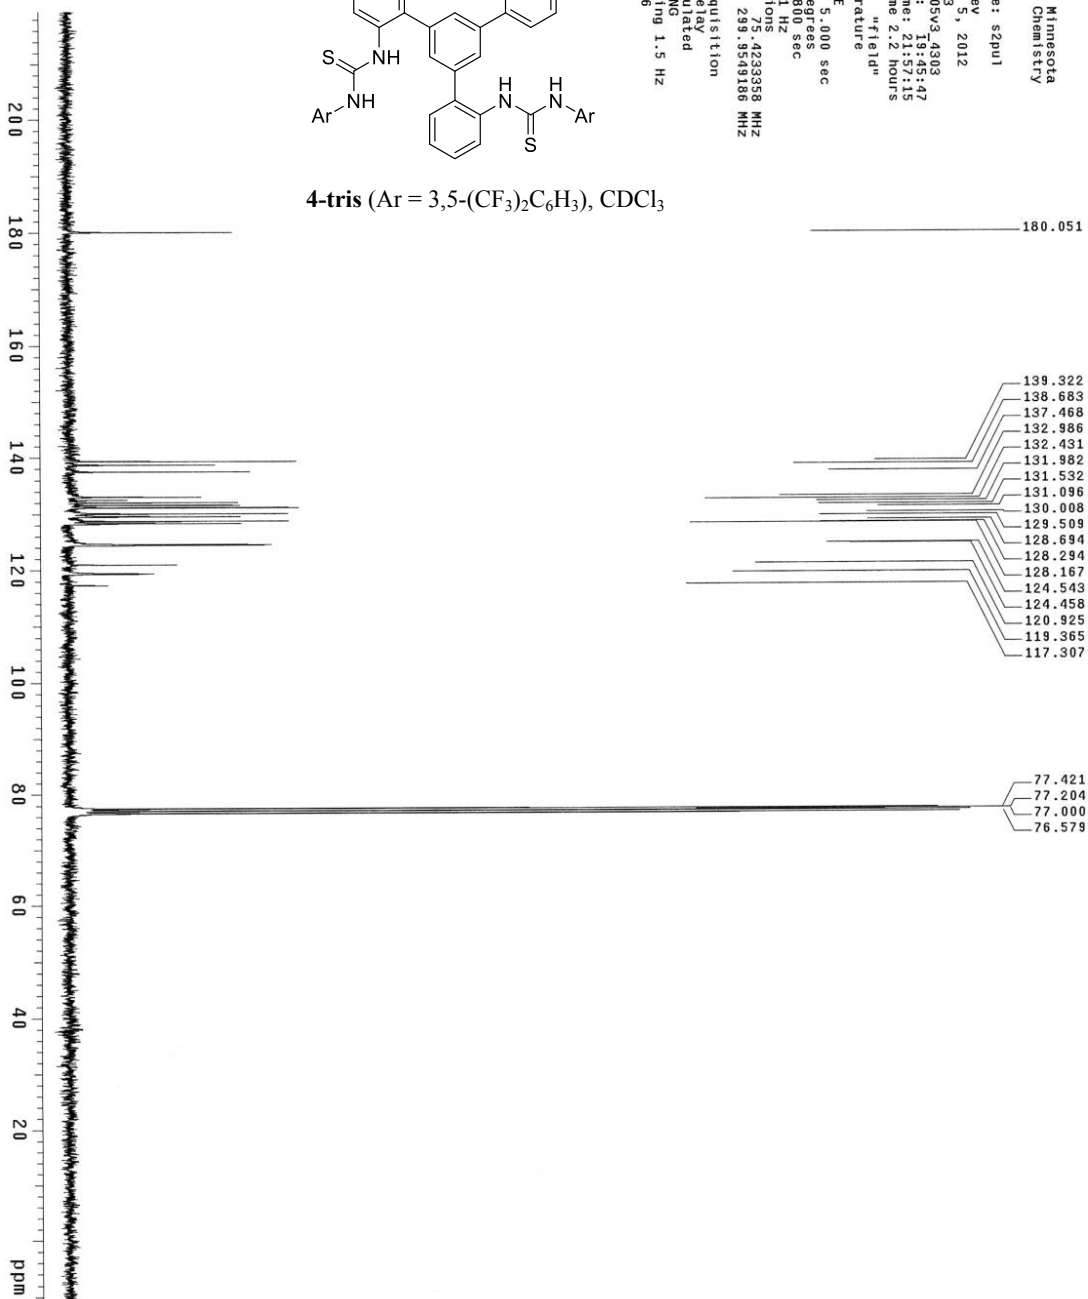

EB2-91  
University of Minnesota  
Department of Chemistry  
VAC-500

Pulse Sequence: szpu1  
User: skabov  
Date: Jun 5, 2012  
Solvent: CDCl3  
File: 120605v3\_4303  
Starting Time: 19:45:47  
Completion Time: 21:57:15  
Total acq. time 2:22 hours  
UNITYplus-500 "field"  
Ambient temperature  
PULSE SEQUENCE  
Relax. delay 5.000 sec  
Pulse 70.0 degrees  
Acq. time 0.800 sec  
Acq. time 0.800 sec  
1024 Repetitions  
OBSERVE C13, 75.423358 MHz  
DECUPLE H1, 299.9549186 MHz  
Power 40 dB  
on during acquisition  
off during delay  
off during delay  
off during delay  
DATA PROCESSING  
Line broadening 1.5 Hz  
Ft size 65536

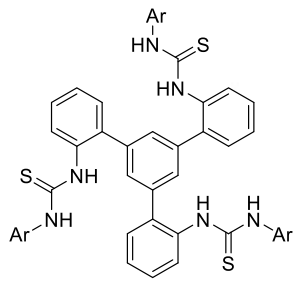

4-tris (Ar = 3,5-(CF<sub>3</sub>)<sub>2</sub>C<sub>6</sub>H<sub>3</sub>), CDCl<sub>3</sub>

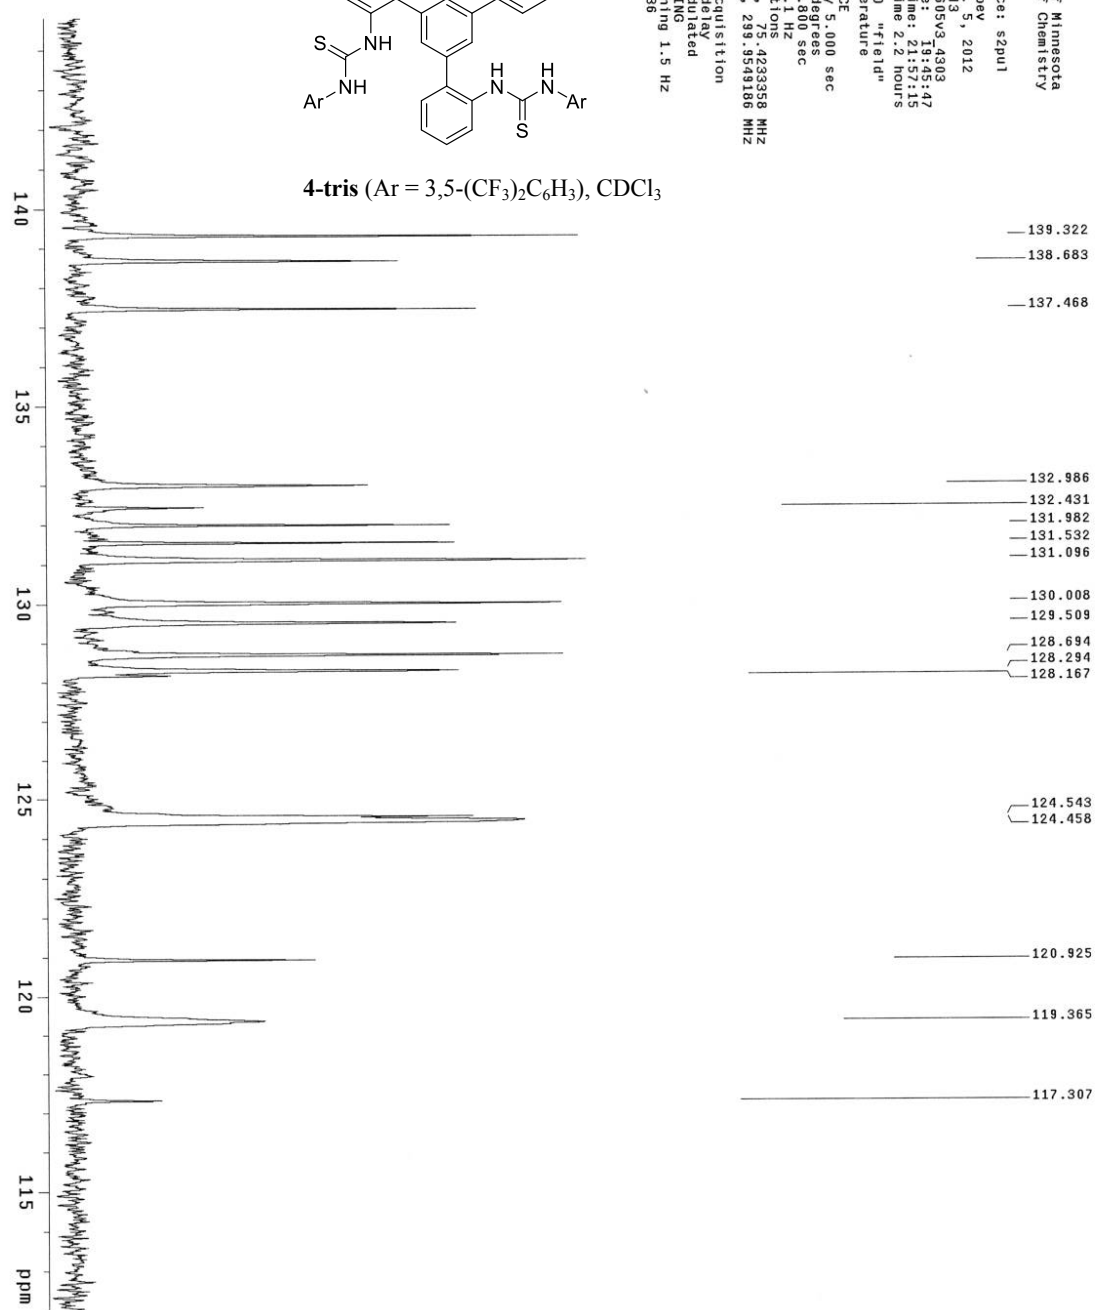

EB2-91  
University of Minnesota  
Department of Chemistry  
VAC-300

Pulse Sequence: zgpg30

User: skaber  
Sample: 43  
Spin rate: 24  
Date: Jun, 5, 2012  
Solvent: CDCl3  
File: 4304  
Starting Time: 21:57:17  
Completion Time: 21:58:29  
Total acq. time 1 minute  
GEMINI-300BB "vac300"  
Ambient temperature  
PULSE SEQUENCE  
Relax. delay 1.500 sec  
Pulse 45.0 degrees  
Acq. time 0.646 sec  
Width 99009.9 Hz  
32 repetitions  
OBSERVE F19, 282.2383023 MHz  
DATA PROCESSING  
Line broadening 0.3 Hz  
FT size 262144

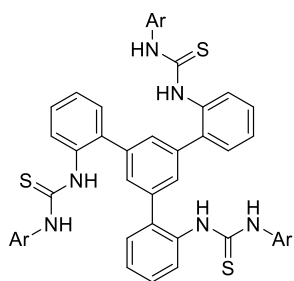

4-tris (Ar = 3,5-(CF<sub>3</sub>)<sub>2</sub>C<sub>6</sub>H<sub>3</sub>), CDCl<sub>3</sub>

150  
100  
50  
0  
-50  
-100  
-150  
ppm

-63.506

**Table S21.** Computed B3LYP/6-31+G(d,p) geometry for the structure provided in figure 3. Its electronic energy = -4517.031796 hartrees.

|    |   |           |           |           |
|----|---|-----------|-----------|-----------|
| 6  | 0 | 0.455629  | -1.265082 | 3.045544  |
| 6  | 0 | -0.941707 | -1.227982 | 2.917632  |
| 6  | 0 | -1.583710 | 0.017644  | 2.889201  |
| 6  | 0 | -0.851127 | 1.214690  | 2.958252  |
| 6  | 0 | 0.547525  | 1.147682  | 3.043563  |
| 6  | 0 | 1.209886  | -0.087986 | 3.090207  |
| 1  | 0 | 0.965049  | -2.222723 | 3.081938  |
| 1  | 0 | -2.664482 | 0.058436  | 2.801167  |
| 1  | 0 | 1.129437  | 2.064313  | 3.066546  |
| 6  | 0 | -1.730810 | -2.484898 | 2.783432  |
| 6  | 0 | -1.392923 | -3.479538 | 1.834582  |
| 6  | 0 | -2.865804 | -2.688384 | 3.585466  |
| 6  | 0 | -2.184049 | -4.628984 | 1.710522  |
| 6  | 0 | -3.638695 | -3.842248 | 3.474736  |
| 1  | 0 | -3.127361 | -1.929242 | 4.316563  |
| 6  | 0 | -3.293035 | -4.814380 | 2.532749  |
| 1  | 0 | -1.925959 | -5.368604 | 0.964360  |
| 1  | 0 | -4.506125 | -3.977808 | 4.113865  |
| 1  | 0 | -3.893767 | -5.712575 | 2.424016  |
| 6  | 0 | -1.535821 | 2.539440  | 2.966780  |
| 6  | 0 | -1.172138 | 3.491255  | 3.937272  |
| 6  | 0 | -2.540958 | 2.888223  | 2.037602  |
| 6  | 0 | -1.791363 | 4.736871  | 4.005921  |
| 1  | 0 | -0.405904 | 3.228817  | 4.660557  |
| 6  | 0 | -3.154893 | 4.145839  | 2.102831  |
| 6  | 0 | -2.791339 | 5.062955  | 3.085072  |
| 1  | 0 | -1.497394 | 5.446536  | 4.773874  |
| 1  | 0 | -3.914176 | 4.394337  | 1.371307  |
| 1  | 0 | -3.279614 | 6.032413  | 3.122822  |
| 7  | 0 | -0.310865 | -3.239687 | 0.943563  |
| 1  | 0 | -0.186655 | -2.263275 | 0.680371  |
| 7  | 0 | 2.945281  | 1.062294  | 1.057409  |
| 1  | 0 | 2.221726  | 0.534729  | 0.556501  |
| 7  | 0 | -2.851532 | 2.000531  | 0.971260  |
| 1  | 0 | -2.052552 | 1.628351  | 0.451327  |
| 6  | 0 | 3.185928  | 2.355909  | 0.694077  |
| 6  | 0 | 0.707571  | -4.086483 | 0.584974  |
| 6  | 0 | -4.088085 | 1.530555  | 0.618688  |
| 16 | 0 | 4.062082  | 3.443619  | 1.628250  |
| 16 | 0 | 0.861852  | -5.663843 | 1.139348  |
| 16 | 0 | -5.487071 | 1.863046  | 1.493819  |
| 7  | 0 | 2.641254  | 2.650562  | -0.544225 |
| 1  | 0 | 2.320165  | 1.861691  | -1.102657 |
| 7  | 0 | -3.995813 | 0.733923  | -0.506450 |
| 1  | 0 | -3.037384 | 0.622137  | -0.856134 |
| 7  | 0 | 1.599362  | -3.432356 | -0.247699 |
| 1  | 0 | 1.424541  | -2.424301 | -0.356027 |
| 6  | 0 | 2.695537  | -0.177283 | 3.162059  |
| 6  | 0 | 3.302875  | -0.898299 | 4.205166  |
| 6  | 0 | 3.525192  | 0.407569  | 2.185305  |
| 6  | 0 | 4.687831  | -1.019258 | 4.293925  |
| 1  | 0 | 2.668667  | -1.351974 | 4.961287  |

|    |   |           |           |           |
|----|---|-----------|-----------|-----------|
| 6  | 0 | 4.916569  | 0.272750  | 2.267385  |
| 6  | 0 | 5.498425  | -0.427821 | 3.320278  |
| 1  | 0 | 5.131778  | -1.573450 | 5.115795  |
| 1  | 0 | 5.533159  | 0.722780  | 1.497718  |
| 1  | 0 | 6.579099  | -0.521214 | 3.372820  |
| 8  | 0 | -1.219329 | 0.752528  | -1.065793 |
| 8  | 0 | 0.948704  | -0.663785 | -0.501373 |
| 15 | 0 | -0.008185 | -0.030635 | -1.498715 |
| 8  | 0 | -0.550875 | -1.160142 | -2.550618 |
| 1  | 0 | 0.137265  | -1.790143 | -2.808750 |
| 8  | 0 | 0.957110  | 0.945923  | -2.422171 |
| 1  | 0 | 0.414526  | 1.593184  | -2.897931 |
| 6  | 0 | 2.726567  | -3.864193 | -0.945186 |
| 6  | 0 | 3.522772  | -2.839965 | -1.515296 |
| 6  | 0 | 3.097347  | -5.208595 | -1.157824 |
| 6  | 0 | 4.648194  | -3.140508 | -2.263935 |
| 1  | 0 | 3.243948  | -1.803233 | -1.354069 |
| 6  | 0 | 4.227427  | -5.508181 | -1.909386 |
| 1  | 0 | 2.504265  | -6.000532 | -0.725805 |
| 6  | 0 | 4.999212  | -4.481094 | -2.457457 |
| 1  | 0 | 5.259393  | -2.356832 | -2.694058 |
| 1  | 0 | 4.515830  | -6.538473 | -2.078248 |
| 6  | 0 | 2.540470  | 3.877674  | -1.210741 |
| 6  | 0 | 2.578940  | 3.846761  | -2.620946 |
| 6  | 0 | 2.344663  | 5.110004  | -0.558271 |
| 6  | 0 | 2.435135  | 5.009710  | -3.364905 |
| 1  | 0 | 2.745771  | 2.900809  | -3.126489 |
| 6  | 0 | 2.204992  | 6.276245  | -1.299754 |
| 1  | 0 | 2.305215  | 5.146024  | 0.520606  |
| 6  | 0 | 2.253699  | 6.222402  | -2.695610 |
| 1  | 0 | 2.476475  | 4.993510  | -4.446898 |
| 1  | 0 | 2.045900  | 7.227781  | -0.807783 |
| 6  | 0 | -4.934066 | 0.030140  | -1.256691 |
| 6  | 0 | -4.402113 | -0.769125 | -2.299845 |
| 6  | 0 | -6.332645 | 0.067732  | -1.075500 |
| 6  | 0 | -5.231051 | -1.500150 | -3.132651 |
| 1  | 0 | -3.326490 | -0.812491 | -2.444154 |
| 6  | 0 | -7.162443 | -0.667927 | -1.913152 |
| 1  | 0 | -6.749264 | 0.668652  | -0.280962 |
| 6  | 0 | -6.616373 | -1.446273 | -2.936457 |
| 1  | 0 | -4.823485 | -2.112283 | -3.927453 |
| 1  | 0 | -8.237123 | -0.641252 | -1.780669 |
| 7  | 0 | -7.495014 | -2.210000 | -3.808396 |
| 8  | 0 | -8.715450 | -2.152641 | -3.607723 |
| 8  | 0 | -6.981917 | -2.881952 | -4.713089 |
| 7  | 0 | 2.112091  | 7.451658  | -3.469275 |
| 8  | 0 | 1.974721  | 8.514939  | -2.854287 |
| 8  | 0 | 2.136083  | 7.368968  | -4.703177 |
| 7  | 0 | 6.181875  | -4.806943 | -3.241814 |
| 8  | 0 | 6.475177  | -5.999844 | -3.390156 |
| 8  | 0 | 6.836854  | -3.874499 | -3.724811 |

## References

40. F. G. Bordwell and D. J. Algrim, *J. Am. Chem. Soc.*, 1988, **110**, 2964-2968.
41. G. Jakab, C. Tancon, Z. Zhan, K. Lippert and P. R. Schreiner, *Org. Lett.*, 2012, **14**, 1724-1727.
42. E. J. Olson and P. Buhlmann, *J. Org. Chem.*, 2011, **76**, 8406-8412.
43. For a related observation, see: P. A. Gale, J. R. Hiscock, S. J. Moore, C. Caltagirone, M. B. Hursthouse and M. E. Light, *Chem. Asian J.* 2010, **5**, 555-561.
